# Supplementary material for: A Comprehensive Summary of Systematic Reviews on Sports Injury Prevention Strategies
Source: PubMed Central journal article supplement — Orthop J Sports Med. 2021 Oct 28;9(10):23259671211035776. doi: 10.1177/23259671211035776 (PMC8558815; doi:10.1177/23259671211035776), 2021-10-28
Supplement: sj-pdf-1-ojs-10.1177_23259671211035776.pdf [file sj-pdf-1-ojs-10.1177_23259671211035776.pdf]

**SUPPLEMENTAL MATERIAL**

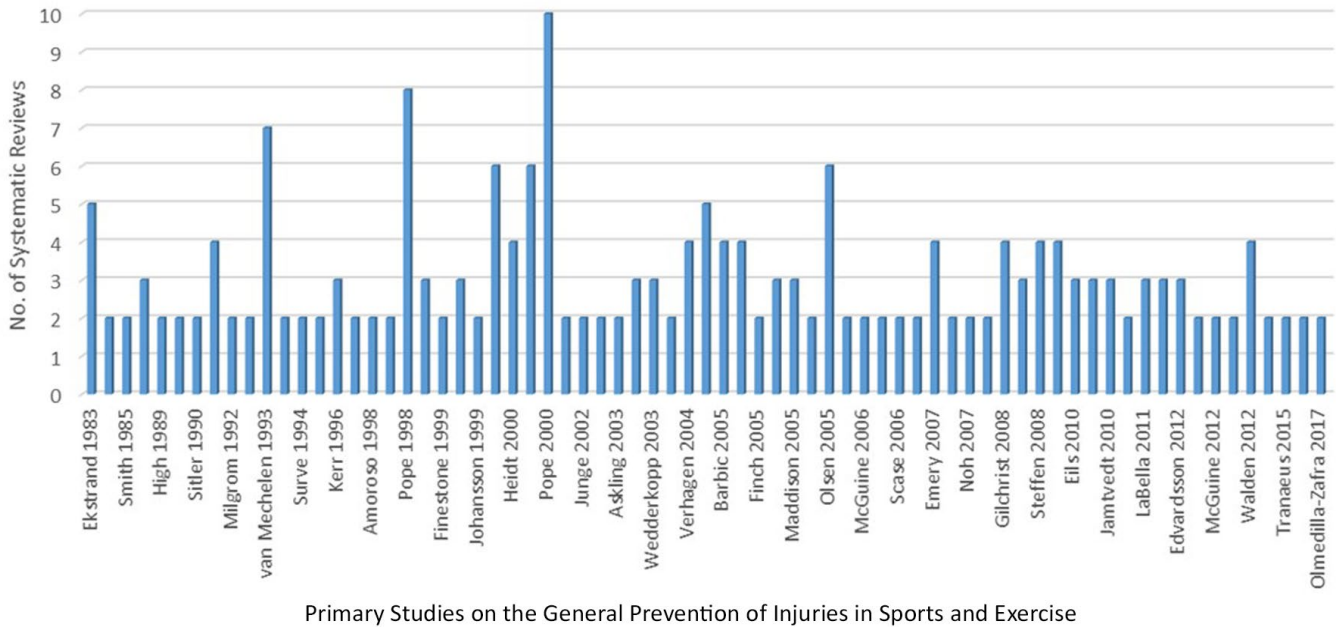

Primary Studies on the General Prevention of Injuries in Sports and Exercise

**Figure S1.** Number of systematic reviews that included each primary study on the prevention of injuries in sports and exercise in general.

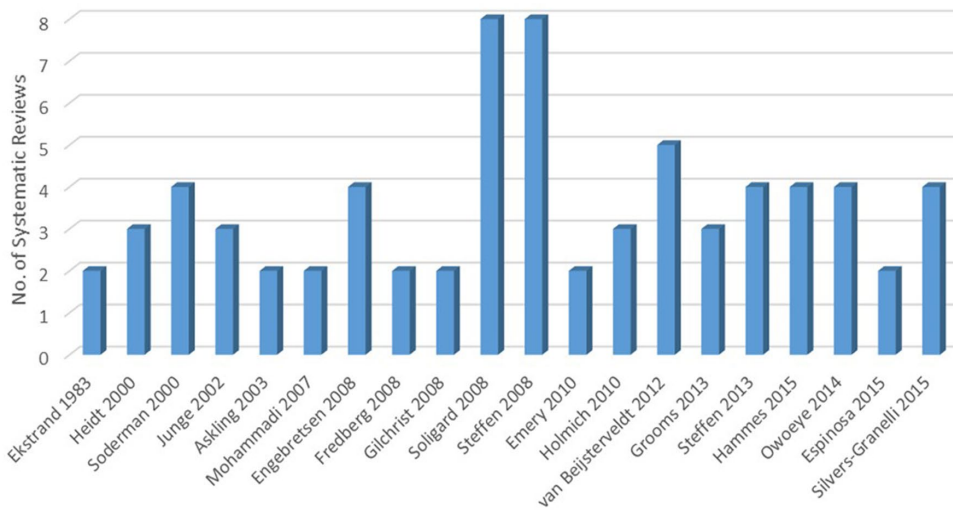

Primary Studies on the Prevention of Injuries in Soccer Players

**Figure S2.** Number of systematic reviews that included each primary study on the topic of prevention of injuries in soccer players.

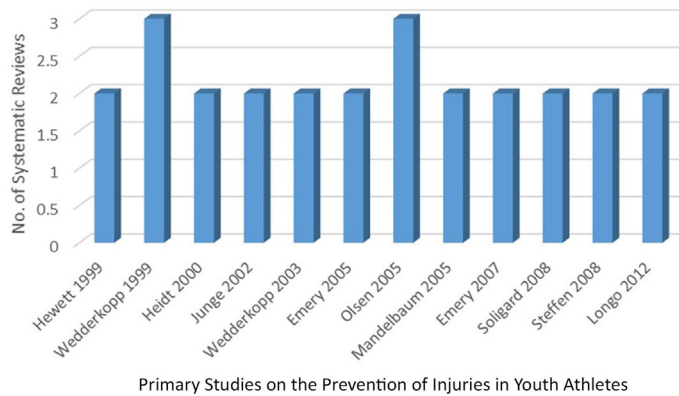

**Figure S3.** Number of systematic reviews that included each primary study on the topic of prevention of injuries in youth athletes.

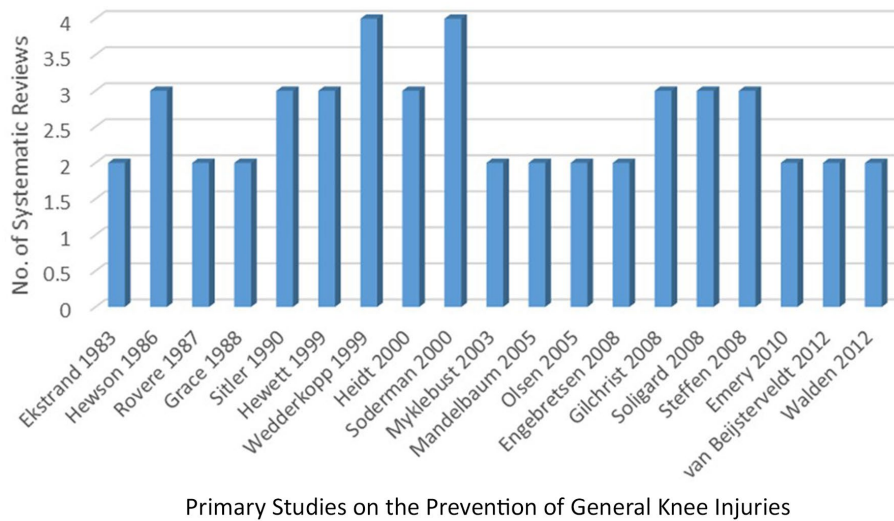

**Figure S4.** Number of systematic reviews that included each primary study on the prevention of general knee injuries.

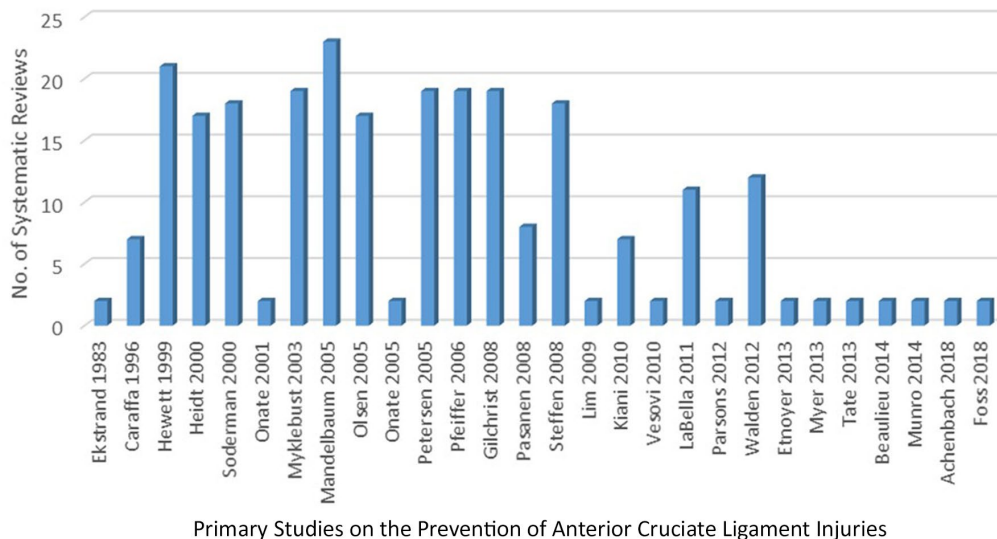

**Figure S5.** Number of systematic reviews that included each primary study on the topic of prevention of anterior cruciate ligament injuries.

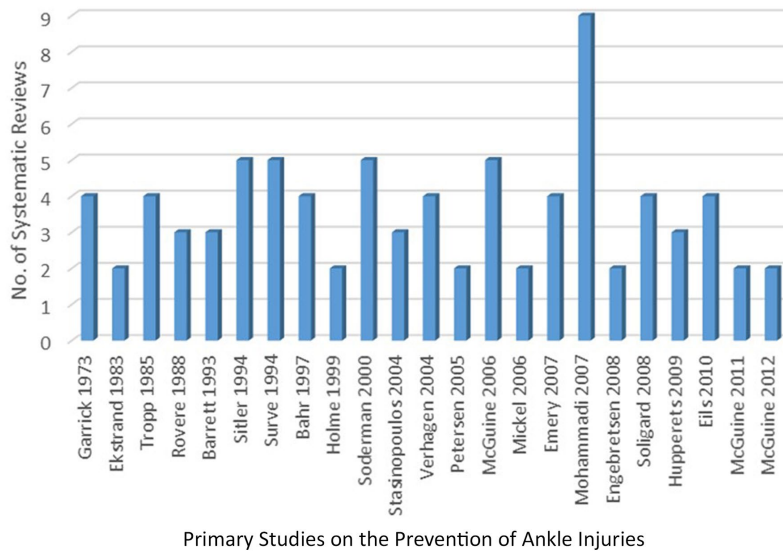

Figure S6. Number of systematic reviews that included each primary study on the prevention of ankle injuries.

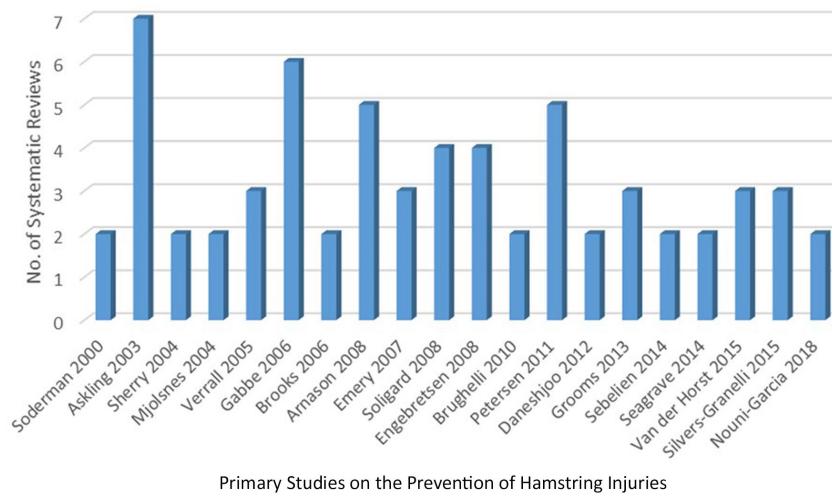

Figure S7. Number of systematic reviews that included each primary study on the prevention of hamstring injuries.

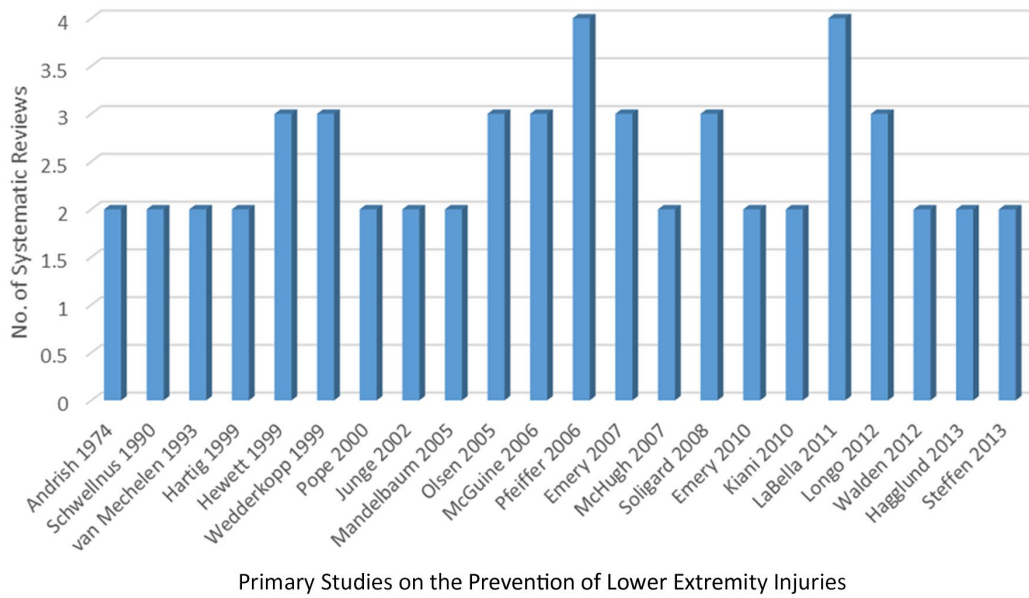

**Figure S8.** Number of systematic reviews that included each primary study on the prevention of lower extremity injuries.

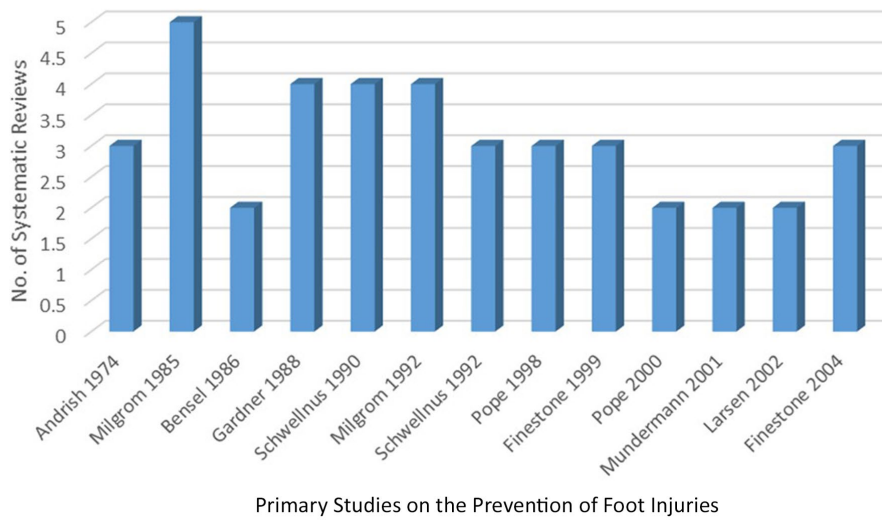

**Figure S9.** Number of systematic reviews that included each primary study on the prevention of foot injuries.

**Table S1.** Level of Evidence and AMSTAR-2 assessment by topic

| Study                                               | LOE | AMSTAR-2 Assessment |                         |                  |                   |                              |                              |                            |              |     |                   |                                |                      |                |                         |                  |                      |
|-----------------------------------------------------|-----|---------------------|-------------------------|------------------|-------------------|------------------------------|------------------------------|----------------------------|--------------|-----|-------------------|--------------------------------|----------------------|----------------|-------------------------|------------------|----------------------|
|                                                     |     | A Priori PICO       | A Priori Review Methods | Selection Design | Literature Search | Study Selection in Duplicate | Data Extraction in Duplicate | Excluded Studies Described | Study Detail | ROB | Source of Funding | Statistical Combination Method | ROB in Meta-analysis | ROB in Results | Heterogeneity Explained | Publication Bias | Conflict of Interest |
| <b>All Injuries- Sports and Exercise in General</b> |     |                     |                         |                  |                   |                              |                              |                            |              |     |                   |                                |                      |                |                         |                  |                      |
| Shrier 1999 <sup>207</sup>                          | II  | Yes                 | Partial Yes             | No               | No                | No                           | No                           | No                         | Partial Yes  |     |                   |                                |                      |                |                         |                  |                      |
| Herbert 2002 <sup>94</sup>                          | II  | Yes                 | Yes                     | No               | Partial Yes       | No                           | No                           | No                         | Partial Yes  |     |                   |                                |                      |                |                         |                  |                      |
| Weldon 2003 <sup>258</sup>                          | II  | Yes                 | Partial Yes             | Yes              | Yes               | No                           | No                           | No                         | Yes          |     |                   |                                |                      |                |                         |                  |                      |
| Thacker 2004 <sup>235</sup>                         | I   | Yes                 | Yes                     | Yes              | Yes               | No                           | No                           | Partial Yes                | Yes          |     |                   |                                |                      |                |                         |                  |                      |
| Fradkin 2006 <sup>69</sup>                          | I   | Yes                 | No                      | No               | Partial Yes       | No                           | No                           | No                         | Partial Yes  |     |                   |                                |                      |                |                         |                  |                      |
| Aaltonen 2007 <sup>1</sup>                          | I   | Yes                 | No                      | Yes              | Partial Yes       | No                           | Yes                          | No                         | Partial Yes  |     |                   |                                |                      |                |                         |                  |                      |
| Small 2008 <sup>212</sup>                           | I   | Yes                 | Partial Yes             | Yes              | Yes               | No                           | No                           | Partial Yes                | Yes          |     |                   |                                |                      |                |                         |                  |                      |
| Hubscher 2010 <sup>107</sup>                        | I   | Yes                 | No                      | No               | Partial Yes       | Yes                          | Yes                          | Yes                        | Yes          |     |                   |                                |                      |                |                         |                  |                      |
| Ernst 2011 <sup>60</sup>                            | II  | Yes                 | No                      | No               | Partial Yes       | No                           | Yes                          | No                         | Yes          |     |                   |                                |                      |                |                         |                  |                      |
| Lauersen 2014 <sup>128</sup>                        | I   | Yes                 | Yes                     | No               | Partial Yes       | Yes                          | Yes                          | No                         | Yes          |     |                   |                                |                      |                |                         |                  |                      |
| Leppanen 2014 <sup>129</sup>                        | I   | Yes                 | No                      | No               | Partial Yes       | No                           | Yes                          | No                         | No           |     |                   |                                |                      |                |                         |                  |                      |
| Lewis 2014 <sup>130</sup>                           | II  | No                  | No                      | No               | Partial Yes       | No                           | Yes                          | No                         | No           |     |                   |                                |                      |                |                         |                  |                      |
| Tranaeus 2015 <sup>239</sup>                        | I   | Yes                 | Partial Yes             | Yes              | Yes               | No                           | No                           | No                         | Yes          |     |                   |                                |                      |                |                         |                  |                      |
| Behm 2016 <sup>24</sup>                             | II  | Yes                 | No                      | No               | Partial Yes       | Yes                          | Yes                          | No                         | No           |     |                   |                                |                      |                |                         |                  |                      |
| Salam 2016 <sup>194</sup>                           | I   | Yes                 | Partial Yes             | Yes              | Yes               | Yes                          | Yes                          | Partial Yes                | Yes          |     |                   |                                |                      |                |                         |                  |                      |
| Brachman 2017 <sup>30</sup>                         | II  | Yes                 | No                      | No               | Partial Yes       | Yes                          | No                           | No                         | No           |     |                   |                                |                      |                |                         |                  |                      |
| Gledhill 2018 <sup>77</sup>                         | II  | Yes                 | Partial Yes             | No               | Partial Yes       | Yes                          | Yes                          | No                         | Partial Yes  |     |                   |                                |                      |                |                         |                  |                      |
| Lauersen 2018 <sup>127</sup>                        | I   | Yes                 | Yes                     | No               | Partial Yes       | Yes                          | Yes                          | No                         | Partial Yes  |     |                   |                                |                      |                |                         |                  |                      |
| Smyth 2019 <sup>214</sup>                           | I   | Yes                 | Partial Yes             | Yes              | Yes               | Yes                          | Yes                          | Partial Yes                | Yes          |     |                   |                                |                      |                |                         |                  |                      |
| Li 2020 <sup>131</sup>                              | I   | Yes                 | Yes                     | No               | Yes               | Yes                          | Yes                          | Partial Yes                | Yes          |     |                   |                                |                      |                |                         |                  |                      |
| <b>All Injuries- Soccer</b>                         |     |                     |                         |                  |                   |                              |                              |                            |              |     |                   |                                |                      |                |                         |                  |                      |
| Kirkendall 2010 <sup>123</sup>                      | II  | Yes                 | No                      | No               | No                | No                           | No                           | No                         | Yes          |     |                   |                                |                      |                |                         |                  |                      |
| Van Beijsterveldt 2013 <sup>243</sup>               | I   | Yes                 | Partial Yes             | Yes              | Yes               | Yes                          | Yes                          | Yes                        | Yes          |     |                   |                                |                      |                |                         |                  |                      |
| Barengo 2014 <sup>21</sup>                          | II  | Yes                 | No                      | No               | Partial Yes       | Yes                          | No                           | No                         | Yes          |     |                   |                                |                      |                |                         |                  |                      |
| Porter 2015 <sup>182</sup>                          | I   | Yes                 | Yes                     | Yes              | Yes               | Yes                          | Yes                          | Partial Yes                | Yes          |     |                   |                                |                      |                |                         |                  |                      |
| Al Attar 2016 <sup>4</sup>                          | II  | Yes                 | No                      | No               | Partial Yes       | Yes                          | Yes                          | No                         | Yes          |     |                   |                                |                      |                |                         |                  |                      |
| Gomes 2017 <sup>79</sup>                            | I   | Yes                 | No                      | No               | Partial Yes       | Yes                          | Yes                          | No                         | Partial Yes  |     |                   |                                |                      |                |                         |                  |                      |
| Sadigursky 2017 <sup>192</sup>                      | I   | Yes                 | Partial Yes             | Yes              | Yes               | No                           | No                           | Partial Yes                | Yes          |     |                   |                                |                      |                |                         |                  |                      |
| Thorburg 2017 <sup>238</sup>                        | I   | Yes                 | Yes                     | Yes              | Yes               | Yes                          | Yes                          | Partial Yes                | Yes          |     |                   |                                |                      |                |                         |                  |                      |
| Kilic 2018 <sup>119</sup>                           | I   | Yes                 | No                      | No               | No                | Yes                          | Yes                          | No                         | Partial Yes  |     |                   |                                |                      |                |                         |                  |                      |
| Slimani 2018 <sup>211</sup>                         | II  | Yes                 | Partial Yes             | No               | Yes               | No                           | Yes                          | Partial Yes                | Yes          |     |                   |                                |                      |                |                         |                  |                      |
| Al Attar 2019 <sup>5</sup>                          | II  | Yes                 | Yes                     | Yes              | Partial Yes       | Yes                          | No                           | No                         | Yes          |     |                   |                                |                      |                |                         |                  |                      |
| Crossley 2020 <sup>43</sup>                         | II  | Yes                 | Yes                     | No               | Partial Yes       | Yes                          | Yes                          | No                         | Yes          |     |                   |                                |                      |                |                         |                  |                      |
| Fanchini 2020 <sup>64</sup>                         | II  | Yes                 | Partial Yes             | Yes              | Yes               | Yes                          | Yes                          | Yes                        | Yes          | Yes | No                | No MA                          | No MA                | Yes            | No                      | No MA            | Yes                  |
| <b>All Injuries- Ice Hockey</b>                     |     |                     |                         |                  |                   |                              |                              |                            |              |     |                   |                                |                      |                |                         |                  |                      |
| Cusimano 2013 <sup>45</sup>                         | II  | Yes                 | No                      | Yes              | Partial Yes       | No                           | Yes                          | Yes                        | Yes          | Yes | No                | No MA                          | No MA                | No             | No                      | No MA            | Yes                  |
| <b>All Injuries- Dance</b>                          |     |                     |                         |                  |                   |                              |                              |                            |              |     |                   |                                |                      |                |                         |                  |                      |
| Hincapie 2008 <sup>103</sup>                        | II  | No                  | No                      | Yes              | Partial Yes       | Yes                          | Yes                          | No                         | Yes          | No  | No                | No MA                          | No MA                | No             | No                      | No MA            | No                   |
| <b>All Injuries- Volleyball</b>                     |     |                     |                         |                  |                   |                              |                              |                            |              |     |                   |                                |                      |                |                         |                  |                      |
| Kilic 2017 <sup>120</sup>                           | II  | Yes                 | No                      | No               | Partial Yes       | Yes                          | Yes                          | No                         | Yes          | Yes | No                | No MA                          | No MA                | Yes            | No                      | No MA            | Yes                  |
| <b>All Injuries- Basketball</b>                     |     |                     |                         |                  |                   |                              |                              |                            |              |     |                   |                                |                      |                |                         |                  |                      |
| Kilic 2018 <sup>121</sup>                           | II  | Yes                 | No                      | No               | Partial Yes       | Yes                          | Yes                          | No                         | Yes          | Yes | No                | No MA                          | No MA                | No             | No                      | No MA            | Yes                  |
| <b>All Injuries- Tackle Collision Sports</b>        |     |                     |                         |                  |                   |                              |                              |                            |              |     |                   |                                |                      |                |                         |                  |                      |
| Sewry 2017 <sup>202</sup>                           | I   | Yes                 | Partial Yes             | Yes              | Yes               | Yes                          | Yes                          | Partial Yes                | Yes          | Yes | No                | No MA                          | No MA                | No             | Yes                     | No               | Yes                  |
| <b>All Injuries- Climbing</b>                       |     |                     |                         |                  |                   |                              |                              |                            |              |     |                   |                                |                      |                |                         |                  |                      |
| Woollings 2015 <sup>260</sup>                       | II  | Yes                 | Partial Yes             | No               | Yes               | Yes                          | No                           | Partial Yes                | Partial Yes  | Yes | No                | No MA                          | No MA                | Yes            | No                      | No MA            | Yes                  |

| Study                                            | LOE | AMSTAR-2 Assessment |                         |                  |                   |                              |                              |                            |              |             |                   |                                |                      |                |                         |                  |                      |
|--------------------------------------------------|-----|---------------------|-------------------------|------------------|-------------------|------------------------------|------------------------------|----------------------------|--------------|-------------|-------------------|--------------------------------|----------------------|----------------|-------------------------|------------------|----------------------|
|                                                  |     | A Priori PICO       | A Priori Review Methods | Selection Design | Literature Search | Study Selection in Duplicate | Data Extraction in Duplicate | Excluded Studies Described | Study Detail | ROB         | Source of Funding | Statistical Combination Method | ROB in Meta-analysis | ROB in Results | Heterogeneity Explained | Publication Bias | Conflict of Interest |
| <b>All Injuries- Youth</b>                       |     |                     |                         |                  |                   |                              |                              |                            |              |             |                   |                                |                      |                |                         |                  |                      |
| Abernethy 2007 <sup>2</sup>                      | II  | Yes                 | Partial Yes             | No               | Partial Yes       | No                           | Yes                          | No                         | Yes          | Yes         | No                | No MA                          | No MA                | Yes            | No                      | No MA            | Yes                  |
| Rossler 2014 <sup>189</sup>                      | I   | Yes                 | No                      | Yes              | Partial Yes       | Yes                          | Yes                          | Partial Yes                | Yes          | Yes         | No                | Yes                            | Yes                  | Yes            | Yes                     | Yes              | Yes                  |
| Soomro 2016 <sup>217</sup>                       | I   | Yes                 | Yes                     | Yes              | Yes               | Yes                          | No                           | Partial Yes                | Yes          | Yes         | No                | Yes                            | Yes                  | Yes            | Yes                     | Yes              | Yes                  |
| Carder 2020 <sup>37</sup>                        | II  | Yes                 | No                      | No               | Partial Yes       | No                           | No                           | No                         | Yes          | Partial Yes | No                | Yes                            | No                   | Yes            | Yes                     | No               | Yes                  |
| <b>Anatomic Site- General Knee</b>               |     |                     |                         |                  |                   |                              |                              |                            |              |             |                   |                                |                      |                |                         |                  |                      |
| Thacker 2003 <sup>236</sup>                      | II  | Yes                 | Partial Yes             | Yes              | Yes               | No                           | Yes                          | Partial Yes                | Partial Yes  | Yes         | No                | Yes                            | Yes                  | Yes            | Yes                     | No               | Yes                  |
| Hewett 2005 <sup>99,A</sup>                      | II  | Yes                 | No                      | No               | No                | No                           | No                           | No                         | Yes          | No          | No                | No MA                          | No MA                | No             | No                      | No MA            | Yes                  |
| Pietrosimone 2008 <sup>179</sup>                 | II  | Yes                 | Partial Yes             | No               | Yes               | No                           | No                           | No                         | Yes          | Yes         | No                | No MA                          | No MA                | No             | No                      | No MA            | No                   |
| Salata 2010 <sup>195</sup>                       | II  | Yes                 | Partial Yes             | Yes              | Partial Yes       | No                           | No                           | No                         | No           | No          | No                | No MA                          | No MA                | Yes            | No                      | No MA            | Yes                  |
| Grimm 2013 <sup>85,A</sup>                       | I   | Yes                 | No                      | Yes              | Partial Yes       | Yes                          | Yes                          | No                         | Partial Yes  | Yes         | No                | No MA                          | No MA                | Yes            | No                      | No MA            | Yes                  |
| Ter Stege 2014 <sup>233</sup>                    | II  | Yes                 | Partial Yes             | No               | Yes               | Yes                          | No                           | Partial Yes                | Yes          | Yes         | No                | No MA                          | No MA                | No             | No                      | No MA            | Yes                  |
| Donnell-Fink 2015 <sup>51</sup>                  | II  | Yes                 | No                      | No               | Partial Yes       | Yes                          | Yes                          | No                         | Partial Yes  | Partial Yes | No                | Yes                            | No                   | No             | Yes                     | Yes              | Yes                  |
| Grimm 2015 <sup>84</sup>                         | I   | Yes                 | No                      | Yes              | Partial Yes       | Yes                          | Yes                          | No                         | Partial Yes  | Yes         | No                | Yes                            | No                   | No             | Yes                     | Yes              | Yes                  |
| <b>Anatomic Site- Anterior Cruciate Ligament</b> |     |                     |                         |                  |                   |                              |                              |                            |              |             |                   |                                |                      |                |                         |                  |                      |
| Olsen 2004 <sup>163</sup>                        | II  | Yes                 | Partial Yes             | No               | Yes               | Yes                          | Yes                          | Partial Yes                | Yes          | Partial Yes | No                | No MA                          | No MA                | No             | No                      | No MA            | No                   |
| Hewett 2005 <sup>99,A</sup>                      | II  | Yes                 | No                      | No               | No                | No                           | No                           | No                         | Yes          | No          | No                | No MA                          | No MA                | No             | No                      | No MA            | Yes                  |
| Grindstaff 2006 <sup>86</sup>                    | II  | Yes                 | No                      | No               | Partial Yes       | No                           | No                           | No                         | Yes          | Yes         | No                | Yes                            | No                   | No             | No                      | No               | No                   |
| Hewett 2006 <sup>96</sup>                        | II  | Yes                 | No                      | No               | No                | No                           | No                           | No                         | Yes          | No          | No                | Yes                            | No                   | No             | Yes                     | No               | Yes                  |
| Padua 2006 <sup>168</sup>                        | II  | Yes                 | Partial Yes             | No               | Yes               | No                           | No                           | No                         | Yes          | No          | No                | No MA                          | No MA                | No             | No                      | No MA            | No                   |
| Yoo 2010 <sup>262</sup>                          | II  | Yes                 | Partial Yes             | No               | Yes               | Yes                          | No                           | No                         | Yes          | No          | No                | Yes                            | No                   | No             | Yes                     | Yes              | No                   |
| Noyes 2012 <sup>161</sup>                        | II  | Yes                 | No                      | No               | Yes               | No                           | No                           | Partial Yes                | Partial Yes  | No          | No                | No MA                          | No MA                | No             | No                      | No MA            | No                   |
| Paskiewicz 2012 <sup>171</sup>                   | I   | Yes                 | Partial Yes             | Yes              | Yes               | No                           | No                           | Partial Yes                | Yes          | No          | No                | No MA                          | No MA                | No             | No                      | No MA            | No                   |
| Sadoghi 2012 <sup>193</sup>                      | I   | Yes                 | Partial Yes             | Yes              | Yes               | Yes                          | Yes                          | Partial Yes                | Yes          | Yes         | No                | Yes                            | Yes                  | Yes            | Yes                     | Yes              | Yes                  |
| Stojanovic 2012 <sup>223</sup>                   | II  | Yes                 | Partial Yes             | Yes              | Yes               | Yes                          | No                           | Partial Yes                | Partial Yes  | Yes         | No                | No MA                          | No MA                | Yes            | Yes                     | No MA            | Yes                  |
| Sugimoto 2012 <sup>228</sup>                     | II  | Yes                 | Partial Yes             | Yes              | Yes               | No                           | No                           | Partial Yes                | Yes          | No          | No                | No MA                          | No MA                | No             | No                      | No MA            | Yes                  |
| Sugimoto 2012 <sup>225</sup>                     | II  | Yes                 | Partial Yes             | Yes              | Yes               | No                           | No                           | Partial Yes                | Yes          | Yes         | No                | No MA                          | No MA                | No             | No                      | No MA            | Yes                  |
| Gagnier 2013 <sup>72</sup>                       | II  | Yes                 | No                      | Yes              | Yes               | Yes                          | Yes                          | No                         | Yes          | Yes         | No                | Yes                            | No                   | Yes            | Yes                     | Yes              | Yes                  |
| Grimm 2013 <sup>85,A</sup>                       | I   | Yes                 | No                      | Yes              | Partial Yes       | Yes                          | Yes                          | No                         | Partial Yes  | Yes         | No                | No MA                          | No MA                | Yes            | No                      | No MA            | Yes                  |
| Myer 2013 <sup>155</sup>                         | I   | Yes                 | Partial Yes             | No               | Yes               | No                           | No                           | Partial Yes                | Yes          | Yes         | No                | Yes                            | No                   | No             | No                      | Yes              | Yes                  |
| Alentorn-Geli 2014 <sup>7</sup>                  | II  | Yes                 | No                      | No               | Partial Yes       | Yes                          | Yes                          | No                         | Yes          | Yes         | No                | No MA                          | No MA                | Yes            | Yes                     | No MA            | No                   |
| Chang 2014 <sup>38</sup>                         | II  | Yes                 | No                      | No               | Partial Yes       | No                           | No                           | No                         | Partial Yes  | No          | No                | No MA                          | No MA                | No             | No                      | No MA            | Yes                  |
| Michalidis 2014 <sup>144</sup>                   | I   | Yes                 | Partial Yes             | No               | Yes               | No                           | No                           | Partial Yes                | Yes          | Partial Yes | No                | No MA                          | No MA                | Yes            | No                      | No MA            | Yes                  |
| Noyes 2014 <sup>160</sup>                        | II  | Yes                 | No                      | Yes              | Yes               | No                           | No                           | Partial Yes                | Partial Yes  | No          | No                | No                             | No                   | No             | No                      | No               | Yes                  |
| Ramirez 2014 <sup>184</sup>                      | I   | Yes                 | Partial Yes             | No               | Yes               | Yes                          | No                           | Partial Yes                | Yes          | No          | No                | Yes                            | No                   | No             | Yes                     | Yes              | Yes                  |
| Sugimoto 2014 <sup>226</sup>                     | I   | Yes                 | Partial Yes             | Yes              | Yes               | Yes                          | No                           | Partial Yes                | Yes          | Yes         | No                | Yes                            | No                   | No             | Yes                     | Yes              | Yes                  |
| Benjaminse 2015 <sup>26</sup>                    | II  | Yes                 | No                      | No               | Partial Yes       | Yes                          | No                           | No                         | Partial Yes  | Yes         | No                | No MA                          | No MA                | No             | Yes                     | No MA            | Yes                  |
| Stevenson 2015 <sup>222</sup>                    | I   | Yes                 | Partial Yes             | Yes              | Yes               | Yes                          | Yes                          | Partial Yes                | Yes          | Yes         | No                | No MA                          | No MA                | Yes            | No                      | No MA            | No                   |
| Sugimoto 2015 <sup>227</sup>                     | I   | Yes                 | Partial Yes             | Yes              | Yes               | Yes                          | No                           | Partial Yes                | Yes          | Yes         | No                | Yes                            | No                   | Yes            | No                      | Yes              | Yes                  |
| Taylor 2015 <sup>232</sup>                       | I   | Yes                 | No                      | Yes              | Yes               | Yes                          | Yes                          | Partial Yes                | Yes          | Yes         | No                | Yes                            | No                   | Yes            | Yes                     | Yes              | Yes                  |
| Monajati 2016 <sup>152, B</sup>                  | I   | Yes                 | Partial Yes             | No               | Yes               | Yes                          | No                           | Partial Yes                | Yes          | Yes         | No                | No MA                          | No MA                | Yes            | No                      | No MA            | Yes                  |
| Sugimoto 2016 <sup>224</sup>                     | I   | Yes                 | Yes                     | Yes              | Yes               | No                           | Yes                          | Partial Yes                | Yes          | Yes         | No                | Yes                            | Yes                  | Yes            | Yes                     | Yes              | Yes                  |
| Pfile 2017 <sup>178</sup>                        | II  | Yes                 | Partial Yes             | No               | Yes               | No                           | No                           | Partial Yes                | Yes          | Yes         | No                | Yes                            | No                   | No             | No                      | No               | No                   |
| Armitano 2018 <sup>42</sup>                      | II  | Yes                 | No                      | No               | Partial Yes       | No                           | No                           | No                         | Partial Yes  | Yes         | No                | No MA                          | No MA                | No             | No                      | No MA            | No                   |
| Arundale 2018 <sup>45</sup>                      | II  | Yes                 | No                      | No               | Partial Yes       | Yes                          | Yes                          | No                         | Yes          | Partial Yes | No                | No                             | Yes                  | Yes            | No                      | No               | Yes                  |
| Webster 2018 <sup>254</sup>                      | II  | Yes                 | Partial Yes             | Yes              | Yes               | Yes                          | No                           | Yes                        | Yes          | Yes         | No                | Yes                            | No                   | Yes            | No                      | No               | No                   |
| Neilson 2019 <sup>157</sup>                      | I   | Yes                 | Partial Yes             | Yes              | Yes               | Yes                          | No                           | Partial Yes                | Partial Yes  | Partial Yes | No                | Yes                            | Yes                  | Yes            | Yes                     | No               | Yes                  |
| Petushkek 2019 <sup>176</sup>                    | I   | Yes                 | Yes                     | Yes              | Yes               | Yes                          | Yes                          | Partial Yes                | Yes          | Yes         | No                | Yes                            | No                   | No             | Yes                     | Yes              | Yes                  |
| Huang 2020 <sup>106</sup>                        | I   | Yes                 | No                      | Yes              | Partial Yes       | Yes                          | No                           | No                         | Partial Yes  | Yes         | No                | Yes                            | Yes                  | Yes            | Yes                     | Yes              | Yes                  |

| Study                                 | LOE | AMSTAR-2 Assessment |                         |                  |                   |                              |                              |                            |              |             |                   |                                |                      |                |                         |                  |                      |
|---------------------------------------|-----|---------------------|-------------------------|------------------|-------------------|------------------------------|------------------------------|----------------------------|--------------|-------------|-------------------|--------------------------------|----------------------|----------------|-------------------------|------------------|----------------------|
|                                       |     | A Priori PICO       | A Priori Review Methods | Selection Design | Literature Search | Study Selection in Duplicate | Data Extraction in Duplicate | Excluded Studies Described | Study Detail | ROB         | Source of Funding | Statistical Combination Method | ROB in Meta-analysis | ROB in Results | Heterogeneity Explained | Publication Bias | Conflict of Interest |
| <b>Anatomic Site- Ankle</b>           |     |                     |                         |                  |                   |                              |                              |                            |              |             |                   |                                |                      |                |                         |                  |                      |
| Thacker 1999 <sup>237</sup>           | II  | Yes                 | Partial Yes             | Yes              | Yes               | No                           | Yes                          | Partial Yes                | Yes          | Yes         | No                | No MA                          | No MA                | Yes            | No                      | No MA            | Yes                  |
| Verhagen 2000 <sup>250</sup>          | II  | Yes                 | Partial Yes             | Yes              | Yes               | No                           | No                           | No                         | Yes          | Yes         | No                | No MA                          | No MA                | Yes            | No                      | No MA            | No                   |
| McKeon 2008 <sup>143</sup>            | II  | Yes                 | Partial Yes             | No               | Partial Yes       | No                           | No                           | No                         | Yes          | Partial Yes | No                | No                             | No                   | No             | No                      | No               | No                   |
| Dizon 2010 <sup>49</sup>              | I   | Yes                 | No                      | Yes              | Yes               | No                           | Yes                          | No                         | Partial Yes  | Yes         | No                | Yes                            | No                   | No             | Yes                     | No               | Yes                  |
| Verhagen 2010 <sup>249</sup>          | II  | Yes                 | Partial Yes             | Yes              | Yes               | No                           | No                           | No                         | Yes          | Yes         | No                | No MA                          | No MA                | No             | No                      | No MA            | Yes                  |
| Schiffan 2015 <sup>197</sup>          | I   | Yes                 | Yes                     | Yes              | Yes               | Yes                          | Yes                          | Partial Yes                | Yes          | Yes         | No                | Yes                            | No                   | Yes            | Yes                     | No               | Yes                  |
| Grimm 2016 <sup>63</sup>              | I   | Yes                 | No                      | Yes              | Partial Yes       | Yes                          | Yes                          | No                         | Partial Yes  | Yes         | No                | Yes                            | No                   | Yes            | Yes                     | Yes              | Yes                  |
| Doherty 2017 <sup>50</sup>            | II  | No                  | No                      | Yes              | Partial Yes       | No                           | No                           | No                         | Partial Yes  | No          | No                | Yes                            | Yes                  | No             | Yes                     | No               | Yes                  |
| Kalirathinam 2017 <sup>116</sup>      | I   | Yes                 | No                      | No               | Partial Yes       | No                           | Yes                          | No                         | Yes          | Yes         | No                | Yes                            | No                   | No             | Yes                     | No               | Yes                  |
| Barelds 2018 <sup>20</sup>            | I   | Yes                 | No                      | Yes              | Partial Yes       | Yes                          | Yes                          | No                         | Yes          | Yes         | No                | Yes                            | Yes                  | Yes            | Yes                     | No               | Yes                  |
| Bellows 2018 <sup>25</sup>            | I   | Yes                 | No                      | No               | Partial Yes       | No                           | Yes                          | No                         | Yes          | Yes         | No                | Yes                            | No                   | No             | No                      | No               | Yes                  |
| Burger 2018 <sup>34</sup>             | I   | Yes                 | No                      | No               | Partial Yes       | Yes                          | Yes                          | Yes                        | Yes          | Partial Yes | No                | Yes                            | Yes                  | Yes            | Yes                     | No               | Yes                  |
| De Vasconcelos 2018 <sup>47</sup>     | I   | Yes                 | Yes                     | No               | Partial Yes       | Yes                          | Yes                          | No                         | Yes          | Partial Yes | No                | Yes                            | Yes                  | Yes            | Yes                     | No               | Yes                  |
| Caldemeyer 2020 <sup>35</sup>         | II  | Yes                 | No                      | No               | Partial Yes       | No                           | No                           | No                         | Yes          | Partial Yes | No                | No MA                          | No MA                | No             | Yes                     | No               | Yes                  |
| <b>Anatomic Site- Hamstring</b>       |     |                     |                         |                  |                   |                              |                              |                            |              |             |                   |                                |                      |                |                         |                  |                      |
| Hibbert 2008 <sup>101</sup>           | II  | Yes                 | No                      | No               | Partial Yes       | Yes                          | Yes                          | No                         | Yes          | Yes         | No                | No MA                          | No MA                | No             | No                      | No MA            | No                   |
| Prior 2009 <sup>183</sup>             | I   | Yes                 | Partial Yes             | Yes              | Partial Yes       | Yes                          | Yes                          | No                         | Partial Yes  | No          | No                | No MA                          | No MA                | No             | No                      | No               | Yes                  |
| Goldman 2010 <sup>78</sup>            | I   | Yes                 | No                      | No               | Yes               | Yes                          | Yes                          | Yes                        | Yes          | Yes         | No                | No MA                          | No MA                | Yes            | Yes                     | No MA            | No                   |
| Rogan 2013 <sup>186</sup>             | II  | Yes                 | Partial Yes             | No               | Yes               | Yes                          | Yes                          | Partial Yes                | Yes          | Yes         | No                | No MA                          | No MA                | Yes            | Yes                     | No MA            | Yes                  |
| Goode 2015 <sup>80</sup>              | I   | Yes                 | No                      | No               | Partial Yes       | Yes                          | Yes                          | Yes                        | Yes          | Yes         | No                | Yes                            | No                   | Yes            | Yes                     | No               | Yes                  |
| Michalis 2016 <sup>145</sup>          | I   | Yes                 | Partial Yes             | Yes              | Partial Yes       | No                           | No                           | Partial Yes                | Yes          | Yes         | No                | No MA                          | No MA                | No             | No                      | No MA            | No                   |
| Monajati 2016 <sup>152,8</sup>        | I   | Yes                 | Partial Yes             | No               | Yes               | Yes                          | No                           | Partial Yes                | Yes          | Yes         | No                | No MA                          | No MA                | Yes            | No                      | No MA            | Yes                  |
| Al Attar 2017 <sup>6</sup>            | II  | Yes                 | Yes                     | No               | Partial Yes       | Yes                          | Yes                          | No                         | Yes          | Yes         | No                | Yes                            | No                   | No             | No                      | Yes              | Yes                  |
| Shadle 2017 <sup>203</sup>            | II  | Yes                 | Partial Yes             | Yes              | Partial Yes       | No                           | No                           | Partial Yes                | Yes          | No          | No                | No MA                          | No MA                | No             | No                      | No               | No                   |
| Van Dyk 2019 <sup>245</sup>           | I   | Yes                 | Partial Yes             | Yes              | Yes               | Yes                          | Yes                          | Partial Yes                | Yes          | Yes         | No                | Yes                            | Yes                  | No             | Yes                     | Yes              | Yes                  |
| Vatovec 2019 <sup>247</sup>           | II  | Yes                 | Partial Yes             | Yes              | Yes               | Yes                          | No                           | Partial Yes                | Yes          | Yes         | No                | Yes                            | No                   | Yes            | Yes                     | No               | Yes                  |
| <b>Anatomic Site- Lower Extremity</b> |     |                     |                         |                  |                   |                              |                              |                            |              |             |                   |                                |                      |                |                         |                  |                      |
| Yeung 2001 <sup>261</sup>             | II  | Yes                 | Partial Yes             | No               | Yes               | No                           | No                           | No                         | Yes          | Yes         | No                | Yes                            | Yes                  | No             | Yes                     | No               | Yes                  |
| Thacker 2002 <sup>234</sup>           | II  | Yes                 | Partial Yes             | No               | Yes               | No                           | No                           | No                         | Yes          | Yes         | No                | No MA                          | No MA                | Yes            | No                      | No MA            | No                   |
| McGuine 2006 <sup>138</sup>           | II  | Yes                 | Partial Yes             | No               | Partial Yes       | No                           | No                           | Partial Yes                | Partial Yes  | No          | No                | No MA                          | No MA                | No             | No                      | No MA            | No                   |
| Herman 2012 <sup>95</sup>             | II  | No                  | No                      | No               | Partial Yes       | No                           | No                           | Yes                        | Yes          | Yes         | No                | No MA                          | No MA                | Yes            | Yes                     | No MA            | Yes                  |
| Andrew 2013 <sup>10</sup>             | II  | Yes                 | No                      | Yes              | Yes               | No                           | Yes                          | No                         | No           | Yes         | No                | No MA                          | No MA                | Yes            | No                      | No MA            | Yes                  |
| Emery 2015 <sup>58</sup>              | II  | Yes                 | No                      | Yes              | Partial Yes       | Yes                          | No                           | No                         | No           | Yes         | No                | Yes                            | Yes                  | No             | Yes                     | No               | Yes                  |
| McCall 2015 <sup>137</sup>            | I   | Yes                 | Partial Yes             | No               | Yes               | Yes                          | No                           | Partial Yes                | Partial Yes  | Yes         | No                | No MA                          | No MA                | No             | No                      | No MA            | Yes                  |
| Taylor 2015 <sup>231</sup>            | I   | Yes                 | Yes                     | Yes              | Yes               | No                           | No                           | Partial Yes                | Partial Yes  | Yes         | No                | Yes                            | Yes                  | Yes            | Yes                     | Yes              | Yes                  |
| Steib 2017 <sup>221</sup>             | I   | Yes                 | Partial Yes             | Yes              | Yes               | No                           | Yes                          | Partial Yes                | Yes          | Yes         | No                | Yes                            | Yes                  | Yes            | Yes                     | No               | Yes                  |
| Brunner 2019 <sup>33</sup>            | I   | Yes                 | Yes                     | Yes              | Partial Yes       | Yes                          | Yes                          | Yes                        | No           | No          | No                | No MA                          | No MA                | Yes            | No                      | No MA            | Yes                  |
| <b>Anatomic Site- Foot</b>            |     |                     |                         |                  |                   |                              |                              |                            |              |             |                   |                                |                      |                |                         |                  |                      |
| Gillespie 2000 <sup>76</sup>          | I   | Yes                 | Partial Yes             | No               | Partial Yes       | No                           | Yes                          | Yes                        | Partial Yes  | Partial Yes | No                | Yes                            | No                   | Yes            | Yes                     | No               | Yes                  |
| Jones 2002 <sup>114</sup>             | II  | Yes                 | No                      | No               | Yes               | Yes                          | Yes                          | No                         | Yes          | Yes         | No                | No MA                          | No MA                | No             | No                      | No MA            | No                   |
| Rome 2005 <sup>187</sup>              | I   | Yes                 | Yes                     | Yes              | Yes               | Yes                          | Yes                          | Partial Yes                | Partial Yes  | Yes         | No                | Yes                            | Yes                  | Yes            | Yes                     | No               | Yes                  |
| Shaffer 2006 <sup>204</sup>           | II  | Yes                 | Partial Yes             | No               | Partial Yes       | No                           | No                           | No                         | No           | Partial Yes | No                | No MA                          | No MA                | No             | No                      | No MA            | No                   |
| Peters 2016 <sup>173</sup>            | II  | Yes                 | Partial Yes             | No               | Yes               | No                           | No                           | Partial Yes                | Yes          | No          | No                | No MA                          | No MA                | No             | No                      | No MA            | No                   |
| Bonnano 2017 <sup>29</sup>            | I   | Yes                 | No                      | Yes              | Partial Yes       | Yes                          | No                           | No                         | Yes          | Yes         | No                | Yes                            | No                   | Yes            | Yes                     | No               | Yes                  |
| <b>Anatomic Site- Groin</b>           |     |                     |                         |                  |                   |                              |                              |                            |              |             |                   |                                |                      |                |                         |                  |                      |
| Esteve 2015 <sup>62</sup>             | I   | Yes                 | Yes                     | No               | Partial Yes       | Yes                          | Yes                          | No                         | Yes          | Yes         | No                | Yes                            | Yes                  | Yes            | Yes                     | No               | Yes                  |
| Charlton 2017 <sup>39</sup>           | II  | Yes                 | Partial Yes             | No               | Partial Yes       | Yes                          | Yes                          | No                         | Yes          | Yes         | No                | No MA                          | No MA                | Yes            | Yes                     | No MA            | Yes                  |

| Study                          | LOE | AMSTAR-2 Assessment |                         |                  |                   |                              |                              |                            |              |             |                   |                                |                      |                |                         |                  |                      |
|--------------------------------|-----|---------------------|-------------------------|------------------|-------------------|------------------------------|------------------------------|----------------------------|--------------|-------------|-------------------|--------------------------------|----------------------|----------------|-------------------------|------------------|----------------------|
|                                |     | A Priori PICO       | A Priori Review Methods | Selection Design | Literature Search | Study Selection in Duplicate | Data Extraction in Duplicate | Excluded Studies Described | Study Detail | ROB         | Source of Funding | Statistical Combination Method | ROB in Meta-analysis | ROB in Results | Heterogeneity Explained | Publication Bias | Conflict of Interest |
| <b>Anatomic Site- Shoulder</b> |     |                     |                         |                  |                   |                              |                              |                            |              |             |                   |                                |                      |                |                         |                  |                      |
| Asker 2018 <sup>16</sup>       | II  | Yes                 | Yes                     | No               | Partial Yes       | Yes                          | Yes                          | Yes                        | No           | Partial Yes | No                | No MA                          | No MA                | Yes            | Yes                     | No MA            | Yes                  |
| <b>Anatomic Site- Wrist</b>    |     |                     |                         |                  |                   |                              |                              |                            |              |             |                   |                                |                      |                |                         |                  |                      |
| Russell 2007 <sup>191</sup>    | I   | Yes                 | Yes                     | Yes              | Yes               | Yes                          | No                           | Partial Yes                | Yes          | Yes         | Yes               | Yes                            | Yes                  | Yes            | Yes                     | Yes              | Yes                  |
| Kim 2011 <sup>122</sup>        | II  | Yes                 | No                      | No               | Partial Yes       | No                           | No                           | No                         | Partial Yes  | No          | No                | No MA                          | No MA                | No             | No                      | No MA            | Yes                  |
| <b>Anatomic Site- Elbow</b>    |     |                     |                         |                  |                   |                              |                              |                            |              |             |                   |                                |                      |                |                         |                  |                      |
| Deal 2020 <sup>48</sup>        | II  | Yes                 | No                      | No               | No                | Yes                          | No                           | No                         | No           | No          | No                | No MA                          | No MA                | No             | No                      | No MA            | Yes                  |

AMSTAR-2, A Measurement Tool to Assess systematic Reviews; LOE, level of evidence; MA, meta-analysis; PICO, Population, Intervention, Comparator Group, Outcome; ROB, risk of bias.

<sup>A</sup>Study covered both general knee and ACL topics, so was included under both topics.

<sup>B</sup>Study covered both ACL and hamstring topics, so was included under both topics.



**Table S2.** Overlapping Systematic Reviews and Meta-Analyses Pertaining to Prevention of All Injuries in Sports and Exercise in General\*

| Overlapping Studies              | Included Systematic Reviews and Meta-Analyses |                            |                            |                             |                            |                            |                           |                              |                              |                              |                           |                              |                         |                           |                             |                             |                              |                           |                        |
|----------------------------------|-----------------------------------------------|----------------------------|----------------------------|-----------------------------|----------------------------|----------------------------|---------------------------|------------------------------|------------------------------|------------------------------|---------------------------|------------------------------|-------------------------|---------------------------|-----------------------------|-----------------------------|------------------------------|---------------------------|------------------------|
|                                  | Shrier 1999 <sup>207</sup>                    | Herbert 2002 <sup>94</sup> | Weldon 2003 <sup>258</sup> | Thacker 2004 <sup>235</sup> | Fradkin 2006 <sup>69</sup> | Aaltonen 2007 <sup>1</sup> | Small 2008 <sup>212</sup> | Hubscher 2010 <sup>107</sup> | Lauersen 2014 <sup>128</sup> | Leppanen 2014 <sup>129</sup> | Lewis 2014 <sup>130</sup> | Tranaeus 2015 <sup>239</sup> | Behm 2016 <sup>24</sup> | Salam 2016 <sup>194</sup> | Brachman 2017 <sup>30</sup> | Gledhill 2018 <sup>77</sup> | Lauersen 2018 <sup>127</sup> | Smyth 2019 <sup>214</sup> | Li 2020 <sup>131</sup> |
| Ekstrand 1983 <sup>54</sup>      | √                                             |                            | √                          |                             |                            | √                          |                           |                              |                              | √                            |                           |                              | √                       |                           |                             |                             |                              |                           |                        |
| Milgrom 1985 <sup>148</sup>      |                                               |                            |                            |                             |                            | √                          |                           |                              |                              | √                            |                           |                              |                         |                           |                             |                             |                              |                           |                        |
| Smith 1985 <sup>213</sup>        |                                               |                            |                            |                             |                            | √                          |                           |                              |                              | √                            |                           |                              |                         |                           |                             |                             |                              |                           |                        |
| Tropp 1985 <sup>241</sup>        |                                               |                            |                            |                             |                            | √                          |                           | √                            |                              | √                            |                           |                              |                         |                           |                             |                             |                              |                           |                        |
| High 1989 <sup>102</sup>         |                                               | √                          |                            |                             |                            |                            |                           |                              |                              |                              |                           |                              | √                       |                           |                             |                             |                              |                           |                        |
| Schwellnus 1990 <sup>199</sup>   |                                               |                            |                            |                             |                            | √                          |                           |                              |                              | √                            |                           |                              |                         |                           |                             |                             |                              |                           |                        |
| Sitler 1990 <sup>209</sup>       |                                               |                            |                            |                             |                            | √                          |                           |                              |                              | √                            |                           |                              |                         |                           |                             |                             |                              |                           |                        |
| Bixler 1992 <sup>28</sup>        |                                               |                            | √                          | √                           | √                          |                            | √                         |                              |                              |                              |                           |                              |                         |                           |                             |                             |                              |                           |                        |
| Milgrom 1992 <sup>147</sup>      |                                               |                            |                            |                             |                            | √                          |                           |                              |                              | √                            |                           |                              |                         |                           |                             |                             |                              |                           |                        |
| Barrett 1993 <sup>22</sup>       |                                               |                            |                            |                             |                            | √                          |                           |                              |                              | √                            |                           |                              |                         |                           |                             |                             |                              |                           |                        |
| Van Mechelen 1993 <sup>246</sup> | √                                             |                            | √                          |                             | √                          | √                          | √                         |                              |                              | √                            |                           |                              | √                       |                           |                             |                             |                              |                           |                        |
| Sitler 1994 <sup>210</sup>       |                                               |                            |                            |                             |                            | √                          |                           |                              |                              | √                            |                           |                              |                         |                           |                             |                             |                              |                           |                        |
| Surve 1994 <sup>229</sup>        |                                               |                            |                            |                             |                            | √                          |                           |                              |                              | √                            |                           |                              |                         |                           |                             |                             |                              |                           |                        |
| Gulick 1996 <sup>89</sup>        |                                               | √                          |                            |                             |                            |                            |                           |                              |                              |                              |                           |                              | √                       |                           |                             |                             |                              |                           |                        |
| Kerr 1996 <sup>117</sup>         |                                               |                            |                            |                             |                            |                            |                           |                              |                              |                              |                           | √                            |                         |                           |                             | √                           |                              |                           | √                      |
| Wester 1996 <sup>259</sup>       |                                               |                            |                            |                             |                            |                            |                           | √                            |                              | √                            |                           |                              |                         |                           |                             |                             |                              |                           |                        |
| Amoroso 1998 <sup>8</sup>        |                                               |                            |                            |                             |                            | √                          |                           |                              |                              | √                            |                           |                              |                         |                           |                             |                             |                              |                           |                        |
| Jlrgenson 1998 <sup>111</sup>    |                                               |                            |                            |                             |                            | √                          |                           |                              |                              | √                            |                           |                              |                         |                           |                             |                             |                              |                           |                        |
| Pope 1998 <sup>180</sup>         |                                               | √                          | √                          | √                           |                            | √                          | √                         |                              | √                            | √                            |                           |                              | √                       |                           |                             |                             |                              |                           |                        |
| Cross 1999 <sup>42</sup>         |                                               |                            | √                          | √                           |                            |                            | √                         |                              |                              |                              |                           |                              |                         |                           |                             |                             |                              |                           |                        |
| Finestone 1999 <sup>66</sup>     |                                               |                            |                            |                             |                            | √                          |                           |                              |                              | √                            |                           |                              |                         |                           |                             |                             |                              |                           |                        |
| Hartig 1999 <sup>92</sup>        |                                               |                            | √                          | √                           |                            |                            | √                         |                              |                              |                              |                           |                              |                         |                           |                             |                             |                              |                           |                        |
| Johansson 1999 <sup>112</sup>    |                                               | √                          |                            |                             |                            |                            |                           |                              |                              |                              |                           |                              | √                       |                           |                             |                             |                              |                           |                        |
| Wedderkopp 1999 <sup>256</sup>   |                                               |                            |                            |                             | √                          | √                          |                           | √                            | √                            | √                            |                           |                              |                         | √                         |                             |                             |                              |                           |                        |
| Heidt 2000 <sup>93</sup>         |                                               |                            |                            |                             |                            | √                          |                           | √                            | √                            | √                            |                           |                              |                         |                           |                             |                             |                              |                           |                        |
| Soderman 2000 <sup>215</sup>     |                                               |                            |                            |                             |                            | √                          |                           | √                            | √                            | √                            |                           |                              |                         | √                         | √                           |                             |                              |                           |                        |
| Pope 2000 <sup>181</sup>         |                                               | √                          | √                          | √                           | √                          | √                          | √                         |                              | √                            | √                            | √                         |                              | √                       |                           |                             |                             |                              |                           |                        |
| Ronning 2001 <sup>188</sup>      |                                               |                            |                            |                             |                            | √                          |                           |                              |                              | √                            |                           |                              |                         |                           |                             |                             |                              |                           |                        |
| Junge 2002 <sup>115</sup>        |                                               |                            |                            |                             |                            |                            |                           |                              |                              |                              |                           |                              |                         | √                         |                             |                             |                              | √                         |                        |
| Machold 2002 <sup>134</sup>      |                                               |                            |                            |                             |                            | √                          |                           |                              |                              | √                            |                           |                              |                         |                           |                             |                             |                              |                           |                        |
| Askling 2003 <sup>17</sup>       |                                               |                            |                            |                             |                            |                            |                           |                              | √                            | √                            |                           |                              |                         |                           |                             |                             |                              |                           |                        |
| Perna 2003 <sup>172</sup>        |                                               |                            |                            |                             |                            |                            |                           |                              |                              |                              |                           | √                            |                         |                           |                             | √                           |                              |                           | √                      |
| Wedderkopp 2003 <sup>255</sup>   |                                               |                            |                            |                             |                            | √                          |                           | √                            |                              | √                            |                           |                              |                         |                           |                             |                             |                              |                           |                        |
| Kolt 2004 <sup>124</sup>         |                                               |                            |                            |                             |                            |                            |                           |                              |                              |                              |                           |                              |                         |                           |                             | √                           |                              |                           | √                      |
| Verhagen 2004 <sup>248</sup>     |                                               |                            |                            |                             |                            | √                          |                           | √                            |                              | √                            |                           |                              |                         |                           | √                           |                             |                              |                           |                        |
| Arnason 2005 <sup>14</sup>       |                                               |                            |                            |                             |                            | √                          |                           |                              |                              | √                            |                           |                              |                         |                           |                             | √                           |                              |                           | √                      |
| Barbic 2005 <sup>19</sup>        |                                               |                            |                            |                             |                            | √                          |                           |                              |                              | √                            |                           |                              |                         | √                         |                             |                             |                              | √                         |                        |
| Emery 2005 <sup>55</sup>         |                                               |                            |                            |                             |                            | √                          |                           | √                            | √                            | √                            |                           |                              |                         |                           |                             |                             |                              |                           |                        |
| Finch 2005 <sup>65</sup>         |                                               |                            |                            |                             |                            | √                          |                           |                              |                              |                              |                           |                              |                         | √                         |                             |                             |                              |                           |                        |
| Johnson 2005 <sup>113</sup>      |                                               |                            |                            |                             |                            |                            |                           |                              |                              |                              |                           | √                            |                         |                           |                             |                             |                              | √                         | √                      |
| Maddison 2005 <sup>135</sup>     |                                               |                            |                            |                             |                            |                            |                           |                              |                              |                              |                           | √                            |                         |                           |                             | √                           |                              |                           | √                      |
| Mandelbaum 2005 <sup>136</sup>   |                                               |                            |                            |                             |                            |                            |                           | √                            |                              |                              |                           |                              |                         |                           | √                           |                             |                              |                           |                        |
| Olsen 2005 <sup>164</sup>        |                                               |                            |                            |                             | √                          | √                          |                           | √                            |                              | √                            |                           |                              |                         | √                         |                             |                             | √                            |                           |                        |
| Petersen 2005 <sup>175</sup>     |                                               |                            |                            |                             |                            |                            |                           | √                            |                              |                              |                           |                              |                         |                           | √                           |                             |                              |                           |                        |
| McGuine 2006 <sup>141</sup>      |                                               |                            |                            |                             |                            |                            |                           |                              |                              | √                            |                           |                              |                         | √                         |                             |                             |                              |                           |                        |
| Pfeiffer 2006 <sup>177</sup>     |                                               |                            |                            |                             |                            |                            |                           | √                            |                              |                              |                           |                              |                         | √                         |                             |                             |                              |                           |                        |
| Scase 2006 <sup>196</sup>        |                                               |                            |                            |                             |                            |                            |                           |                              |                              |                              |                           |                              |                         | √                         |                             |                             |                              | √                         |                        |
| Cumps 2007 <sup>44</sup>         |                                               |                            |                            |                             |                            |                            |                           | √                            |                              |                              |                           |                              |                         |                           | √                           |                             |                              |                           |                        |
| Emery 2007 <sup>57</sup>         |                                               |                            |                            |                             |                            |                            |                           | √                            |                              | √                            | √                         |                              |                         | √                         |                             |                             |                              |                           |                        |
| Mohammadi 2007 <sup>150</sup>    |                                               |                            |                            |                             |                            |                            |                           | √                            |                              | √                            |                           |                              |                         |                           |                             |                             |                              |                           |                        |
| Noh 2007 <sup>158</sup>          |                                               |                            |                            |                             |                            |                            |                           |                              |                              |                              |                           | √                            |                         |                           |                             | √                           |                              |                           |                        |

| Overlapping Studies                      | Included Systematic Reviews and Meta-Analyses |                               |                               |                                |                               |                               |                              |                                 |                                 |                                 |                              |                                 |                            |                              |                                |                                |                                 |                              |                           |   |
|------------------------------------------|-----------------------------------------------|-------------------------------|-------------------------------|--------------------------------|-------------------------------|-------------------------------|------------------------------|---------------------------------|---------------------------------|---------------------------------|------------------------------|---------------------------------|----------------------------|------------------------------|--------------------------------|--------------------------------|---------------------------------|------------------------------|---------------------------|---|
|                                          | Shrier<br>1999 <sup>207</sup>                 | Herbert<br>2002 <sup>94</sup> | Weldon<br>2003 <sup>258</sup> | Thacker<br>2004 <sup>235</sup> | Fradkin<br>2006 <sup>69</sup> | Aaltonen<br>2007 <sup>1</sup> | Small<br>2008 <sup>212</sup> | Hubscher<br>2010 <sup>107</sup> | Lauersen<br>2014 <sup>128</sup> | Leppanen<br>2014 <sup>129</sup> | Lewis<br>2014 <sup>130</sup> | Tranaeus<br>2015 <sup>239</sup> | Behm<br>2016 <sup>24</sup> | Salam<br>2016 <sup>194</sup> | Brachman<br>2017 <sup>30</sup> | Gledhill<br>2018 <sup>77</sup> | Lauersen<br>2018 <sup>127</sup> | Smyth<br>2019 <sup>214</sup> | Li<br>2020 <sup>131</sup> |   |
| Engebretsen 2008 <sup>59</sup>           |                                               |                               |                               |                                |                               |                               |                              | √                               |                                 | √                               |                              |                                 |                            |                              |                                |                                |                                 |                              |                           |   |
| Gilchrist 2008 <sup>75</sup>             |                                               |                               |                               |                                |                               |                               |                              | √                               | √                               | √                               |                              |                                 |                            |                              |                                |                                |                                 |                              | √                         |   |
| Pasanen 2008 <sup>170</sup>              |                                               |                               |                               |                                |                               |                               |                              | √                               | √                               | √                               |                              |                                 |                            |                              |                                |                                |                                 |                              |                           |   |
| Steffen 2008 <sup>220</sup>              |                                               |                               |                               |                                |                               |                               |                              | √                               |                                 | √                               |                              |                                 |                            | √                            | √                              |                                |                                 |                              |                           |   |
| Soligard 2008 <sup>216</sup>             |                                               |                               |                               |                                |                               |                               |                              |                                 | √                               | √                               | √                            |                                 |                            |                              | √                              |                                |                                 |                              |                           |   |
| Eils 2010 <sup>53</sup>                  |                                               |                               |                               |                                |                               |                               |                              |                                 | √                               | √                               |                              |                                 |                            |                              | √                              |                                |                                 |                              |                           |   |
| Emery 2010 <sup>56</sup>                 |                                               |                               |                               |                                |                               |                               |                              |                                 | √                               | √                               |                              |                                 |                            | √                            |                                |                                |                                 |                              |                           |   |
| Jamtvedt 2010 <sup>110</sup>             |                                               |                               |                               |                                |                               |                               |                              |                                 | √                               | √                               | √                            |                                 |                            |                              |                                |                                |                                 |                              |                           |   |
| Coppack 2011 <sup>41</sup>               |                                               |                               |                               |                                |                               |                               |                              |                                 | √                               |                                 |                              |                                 |                            |                              |                                |                                | √                               |                              |                           |   |
| LaBella 2011 <sup>125</sup>              |                                               |                               |                               |                                |                               |                               |                              |                                 | √                               | √                               |                              |                                 |                            | √                            |                                |                                |                                 |                              |                           |   |
| Petersen 2011 <sup>174</sup>             |                                               |                               |                               |                                |                               |                               |                              |                                 | √                               | √                               |                              |                                 |                            |                              |                                |                                | √                               |                              |                           |   |
| Edvardsson 2012 <sup>52</sup>            |                                               |                               |                               |                                |                               |                               |                              |                                 |                                 |                                 |                              | √                               |                            |                              |                                | √                              |                                 |                              |                           | √ |
| Longo 2012 <sup>133</sup>                |                                               |                               |                               |                                |                               |                               |                              |                                 | √                               | √                               |                              |                                 |                            |                              |                                |                                |                                 |                              |                           |   |
| McGuine 2012 <sup>140</sup>              |                                               |                               |                               |                                |                               |                               |                              |                                 |                                 | √                               |                              |                                 |                            | √                            |                                |                                |                                 |                              |                           |   |
| Van Beijsterveldt<br>2012 <sup>242</sup> |                                               |                               |                               |                                |                               |                               |                              |                                 | √                               | √                               |                              |                                 |                            |                              |                                |                                |                                 |                              |                           |   |
| Walden 2012 <sup>253</sup>               |                                               |                               |                               |                                |                               |                               |                              |                                 | √                               | √                               |                              |                                 |                            | √                            |                                |                                | √                               |                              |                           |   |
| Ivarsson 2015 <sup>109</sup>             |                                               |                               |                               |                                |                               |                               |                              |                                 |                                 |                                 |                              |                                 |                            |                              |                                |                                |                                 | √                            |                           | √ |
| Tranaeus 2015 <sup>240</sup>             |                                               |                               |                               |                                |                               |                               |                              |                                 |                                 |                                 |                              |                                 |                            |                              |                                | √                              |                                 |                              |                           | √ |
| Zouita 2016 <sup>263</sup>               |                                               |                               |                               |                                |                               |                               |                              |                                 |                                 |                                 |                              |                                 |                            |                              |                                |                                | √                               | √                            | √                         |   |
| Olmedilla-Zafra 2017 <sup>162</sup>      |                                               |                               |                               |                                |                               |                               |                              |                                 |                                 |                                 |                              |                                 |                            |                              |                                | √                              |                                 |                              |                           | √ |

\*One study<sup>60</sup> that covered all injuries in sports and exercise in general did not include any overlapping studies and thus was not included.

**Table S3.** Overlapping Systematic Reviews and Meta-Analyses Pertaining to Prevention of All Injuries in Soccer Players\*

| Overlapping Studies                   | Included Systematic Reviews and Meta-Analyses |                                       |                            |                            |                            |                          |                                |                              |                           |                             |                             |
|---------------------------------------|-----------------------------------------------|---------------------------------------|----------------------------|----------------------------|----------------------------|--------------------------|--------------------------------|------------------------------|---------------------------|-----------------------------|-----------------------------|
|                                       | Kirkendall 2010 <sup>123</sup>                | Van Beijsterveldt 2013 <sup>243</sup> | Barengo 2014 <sup>21</sup> | Porter 2015 <sup>182</sup> | Al Attar 2016 <sup>4</sup> | Gomes 2017 <sup>79</sup> | Sadigursky 2017 <sup>192</sup> | Thorburg 2017 <sup>238</sup> | Kilic 2018 <sup>119</sup> | Crossley 2020 <sup>43</sup> | Fanchini 2020 <sup>64</sup> |
| Ekstrand 1983 <sup>54</sup>           | √                                             |                                       |                            |                            |                            |                          |                                |                              | √                         |                             |                             |
| Heidt 2000 <sup>93</sup>              |                                               | √                                     |                            | √                          |                            |                          |                                |                              |                           | √                           |                             |
| Soderman 2000 <sup>215</sup>          |                                               | √                                     |                            | √                          |                            |                          |                                |                              | √                         | √                           |                             |
| Junge 2002 <sup>115</sup>             | √                                             | √                                     |                            |                            | √                          |                          |                                |                              |                           |                             |                             |
| Askling 2003 <sup>17</sup>            | √                                             |                                       |                            | √                          |                            |                          |                                |                              |                           |                             |                             |
| Mohammadi 2007 <sup>150</sup>         | √                                             |                                       |                            | √                          |                            |                          |                                |                              |                           |                             |                             |
| Engebretsen 2008 <sup>59</sup>        | √                                             |                                       |                            | √                          |                            |                          |                                |                              | √                         |                             | √                           |
| Fredberg 2008 <sup>70</sup>           | √                                             |                                       |                            | √                          |                            |                          |                                |                              |                           |                             |                             |
| Gilchrist 2008 <sup>75</sup>          |                                               |                                       |                            |                            |                            |                          |                                |                              | √                         | √                           |                             |
| Soligard 2008 <sup>216</sup>          | √                                             | √                                     | √                          |                            | √                          | √                        | √                              | √                            |                           | √                           |                             |
| Steffen 2008 <sup>220</sup>           | √                                             | √                                     | √                          |                            | √                          | √                        | √                              | √                            |                           | √                           |                             |
| Emery 2010 <sup>56</sup>              |                                               | √                                     |                            |                            |                            |                          |                                |                              |                           | √                           |                             |
| Holmich 2010 <sup>105</sup>           | √                                             |                                       |                            | √                          |                            |                          |                                |                              | √                         |                             |                             |
| Van Beijsterveldt 2012 <sup>242</sup> |                                               |                                       |                            | √                          | √                          | √                        |                                | √                            | √                         |                             |                             |
| Grooms 2013 <sup>87</sup>             |                                               |                                       | √                          |                            | √                          |                          |                                |                              | √                         |                             |                             |
| Steffen 2013 <sup>219</sup>           |                                               |                                       | √                          |                            | √                          | √                        | √                              |                              |                           |                             |                             |
| Hammes 2015 <sup>91</sup>             |                                               |                                       | √                          |                            | √                          |                          | √                              | √                            |                           |                             |                             |
| Owoeye 2014 <sup>167</sup>            |                                               |                                       |                            |                            | √                          | √                        | √                              | √                            |                           |                             |                             |
| Espinosa 2015 <sup>61</sup>           |                                               |                                       |                            |                            |                            |                          |                                |                              |                           | √                           | √                           |
| Silvers-Granelli 2015 <sup>208</sup>  |                                               |                                       |                            |                            |                            | √                        | √                              | √                            | √                         |                             |                             |

\*Two studies<sup>5,211</sup> of all injuries in soccer players did not have any overlapping studies and thus were not included.

**Table S4.** Overlapping Systematic Reviews and Meta-Analyses Pertaining to Prevention of All Injuries in Youth Athletes

| Overlapping Studies            | Included Systematic Reviews and Meta-Analyses |                            |                            |
|--------------------------------|-----------------------------------------------|----------------------------|----------------------------|
|                                | Abernethy 2007 <sup>2</sup>                   | Rosler 2014 <sup>189</sup> | Soomro 2016 <sup>217</sup> |
| Hewett 1999 <sup>97</sup>      | √                                             | √                          |                            |
| Wedderkopp 1999 <sup>256</sup> | √                                             | √                          | √                          |
| Heidt 2000 <sup>93</sup>       | √                                             | √                          |                            |
| Junge 2002 <sup>115</sup>      |                                               | √                          | √                          |
| Wedderkopp 2003 <sup>255</sup> | √                                             |                            | √                          |
| Emery 2005 <sup>55</sup>       | √                                             | √                          |                            |
| Olsen 2005 <sup>164</sup>      | √                                             | √                          | √                          |
| Mandelbaum 2005 <sup>136</sup> | √                                             | √                          |                            |
| Emery 2007 <sup>57</sup>       |                                               | √                          | √                          |
| Soligard 2008 <sup>216</sup>   |                                               | √                          | √                          |
| Steffen 2008 <sup>220</sup>    |                                               | √                          | √                          |
| Longo 2012 <sup>133</sup>      |                                               | √                          | √                          |

**Table S5.** Overlapping Systematic Reviews and Meta-Analyses Pertaining to Prevention of General Knee Injuries

| Overlapping Studies                   | Included Systematic Reviews and Meta-Analyses |                              |                                     |                               |                             |                                  |                                    |                             |
|---------------------------------------|-----------------------------------------------|------------------------------|-------------------------------------|-------------------------------|-----------------------------|----------------------------------|------------------------------------|-----------------------------|
|                                       | Thacker<br>2003 <sup>236</sup>                | Hewett<br>2005 <sup>99</sup> | Pietrosimone<br>2008 <sup>179</sup> | Salata<br>2010 <sup>195</sup> | Grimm<br>2013 <sup>85</sup> | Ter Stege<br>2014 <sup>233</sup> | Donnell-Fink<br>2015 <sup>51</sup> | Grimm<br>2015 <sup>84</sup> |
| Ekstrand 1983 <sup>54</sup>           |                                               |                              |                                     |                               | √                           |                                  |                                    | √                           |
| Hewson 1986 <sup>100</sup>            | √                                             |                              | √                                   | √                             |                             |                                  |                                    |                             |
| Rovere 1987 <sup>190</sup>            | √                                             |                              |                                     | √                             |                             |                                  |                                    |                             |
| Grace 1988 <sup>82</sup>              | √                                             |                              |                                     | √                             |                             |                                  |                                    |                             |
| Sitler 1990 <sup>209</sup>            | √                                             |                              | √                                   | √                             |                             |                                  |                                    |                             |
| Hewett 1999 <sup>97</sup>             | √                                             | √                            |                                     |                               |                             |                                  | √                                  |                             |
| Wedderkopp 1999 <sup>256</sup>        | √                                             | √                            |                                     |                               | √                           |                                  | √                                  |                             |
| Heidt 2000 <sup>93</sup>              | √                                             | √                            |                                     |                               |                             |                                  | √                                  |                             |
| Soderman 2000 <sup>215</sup>          |                                               | √                            |                                     |                               | √                           |                                  | √                                  | √                           |
| Myklebust 2003 <sup>156</sup>         |                                               | √                            |                                     |                               |                             |                                  | √                                  |                             |
| Mandelbaum 2005 <sup>136</sup>        |                                               | √                            |                                     |                               |                             |                                  | √                                  |                             |
| Olsen 2005 <sup>164</sup>             |                                               |                              |                                     |                               | √                           |                                  | √                                  |                             |
| Engebretsen 2008 <sup>59</sup>        |                                               |                              |                                     |                               | √                           |                                  |                                    | √                           |
| Gilchrist 2008 <sup>75</sup>          |                                               |                              |                                     |                               | √                           |                                  | √                                  | √                           |
| Soligard 2008 <sup>216</sup>          |                                               |                              |                                     |                               | √                           |                                  | √                                  | √                           |
| Steffen 2008 <sup>220</sup>           |                                               |                              |                                     |                               | √                           |                                  | √                                  | √                           |
| Emery 2010 <sup>56</sup>              |                                               |                              |                                     |                               | √                           |                                  | √                                  |                             |
| Van Beijsterveldt 2012 <sup>242</sup> |                                               |                              |                                     |                               | √                           |                                  |                                    | √                           |
| Walden 2012 <sup>253</sup>            |                                               |                              |                                     |                               |                             |                                  | √                                  | √                           |

**Table S6.** Overlapping Systematic Reviews and Meta-Analyses Pertaining to Prevention of Anterior Cruciate Ligament Injuries\*

| Overlapping Studies            | Included Systematic Reviews and Meta-Analyses |                           |                           |                               |                           |                         |                           |                                |                             |                                |                              |                              |                            |                          |                          |                                 |                          |
|--------------------------------|-----------------------------------------------|---------------------------|---------------------------|-------------------------------|---------------------------|-------------------------|---------------------------|--------------------------------|-----------------------------|--------------------------------|------------------------------|------------------------------|----------------------------|--------------------------|--------------------------|---------------------------------|--------------------------|
|                                | Olsen 2004 <sup>163</sup>                     | Hewett 2005 <sup>99</sup> | Hewett 2006 <sup>98</sup> | Grindstaff 2006 <sup>86</sup> | Padua 2006 <sup>168</sup> | Yoo 2010 <sup>262</sup> | Noyes 2012 <sup>161</sup> | Paszkiwicz 2012 <sup>171</sup> | Sadoghi 2012 <sup>193</sup> | Stojanovic 2012 <sup>223</sup> | Sugimoto 2012 <sup>225</sup> | Sugimoto 2012 <sup>228</sup> | Gagnier 2013 <sup>72</sup> | Grimm 2013 <sup>85</sup> | Myer 2013 <sup>155</sup> | Alentorn-Geli 2014 <sup>7</sup> | Chang 2014 <sup>38</sup> |
| Ekstrand 1983 <sup>54</sup>    | √                                             |                           |                           |                               |                           |                         |                           |                                |                             |                                |                              |                              |                            | √                        |                          |                                 |                          |
| Caraffa 1996 <sup>36</sup>     | √                                             |                           |                           |                               | √                         |                         |                           |                                |                             | √                              |                              |                              | √                          |                          |                          | √                               |                          |
| Hewett 1999 <sup>97</sup>      |                                               | √                         | √                         | √                             | √                         | √                       | √                         |                                | √                           | √                              | √                            | √                            | √                          |                          | √                        |                                 |                          |
| Wedderkopp 1999 <sup>256</sup> |                                               | √                         |                           |                               |                           |                         |                           |                                |                             |                                |                              |                              |                            | √                        |                          |                                 |                          |
| Heidt 2000 <sup>93</sup>       |                                               | √                         | √                         |                               | √                         | √                       |                           |                                | √                           | √                              | √                            | √                            | √                          |                          | √                        |                                 |                          |
| Soderman 2000 <sup>215</sup>   |                                               | √                         | √                         |                               | √                         | √                       |                           |                                |                             | √                              | √                            | √                            | √                          | √                        | √                        |                                 |                          |
| Onate 2001 <sup>166</sup>      |                                               |                           |                           |                               |                           |                         |                           |                                |                             |                                |                              |                              |                            |                          |                          |                                 |                          |
| Myklebust 2003 <sup>156</sup>  |                                               | √                         | √                         | √                             | √                         | √                       | √                         |                                |                             | √                              | √                            | √                            | √                          |                          | √                        |                                 |                          |
| Mandelbaum 2005 <sup>136</sup> |                                               | √                         | √                         | √                             | √                         | √                       | √                         | √                              | √                           | √                              |                              | √                            | √                          |                          | √                        |                                 | √                        |
| Olsen 2005 <sup>164</sup>      |                                               |                           |                           | √                             | √                         |                         |                           |                                | √                           |                                |                              | √                            | √                          | √                        | √                        |                                 |                          |
| Onate 2005 <sup>165</sup>      |                                               |                           |                           |                               |                           |                         |                           |                                |                             |                                |                              |                              |                            |                          |                          |                                 |                          |
| Petersen 2005 <sup>175</sup>   |                                               |                           | √                         | √                             |                           | √                       |                           |                                | √                           | √                              |                              | √                            | √                          |                          | √                        |                                 | √                        |
| Pfeiffer 2006 <sup>177</sup>   |                                               |                           |                           |                               |                           | √                       | √                         | √                              | √                           | √                              |                              | √                            | √                          |                          | √                        |                                 |                          |
| Gilchrist 2008 <sup>75</sup>   |                                               |                           |                           |                               |                           |                         | √                         |                                | √                           | √                              |                              | √                            | √                          | √                        | √                        |                                 | √                        |
| Pasanen 2008 <sup>170</sup>    |                                               |                           |                           |                               |                           |                         |                           |                                |                             |                                |                              |                              | √                          |                          | √                        |                                 |                          |
| Steffen 2008 <sup>220</sup>    |                                               |                           |                           |                               |                           |                         | √                         | √                              |                             |                                | √                            | √                            | √                          | √                        | √                        |                                 |                          |
| Lim 2009 <sup>132</sup>        |                                               |                           |                           |                               |                           |                         | √                         |                                |                             |                                |                              |                              |                            |                          |                          |                                 |                          |
| Kiani 2010 <sup>118</sup>      |                                               |                           |                           |                               |                           |                         |                           |                                |                             |                                | √                            | √                            | √                          |                          |                          |                                 |                          |
| Vescovi 2010 <sup>252</sup>    |                                               |                           |                           |                               |                           |                         | √                         |                                |                             |                                |                              |                              |                            |                          |                          |                                 |                          |
| LaBella 2011 <sup>125</sup>    |                                               |                           |                           |                               |                           |                         |                           |                                |                             |                                |                              | √                            |                            |                          | √                        |                                 |                          |
| Parsons 2012 <sup>169</sup>    |                                               |                           |                           |                               |                           |                         |                           |                                |                             |                                |                              |                              |                            |                          |                          |                                 |                          |
| Walden 2012 <sup>253</sup>     |                                               |                           |                           |                               |                           |                         |                           |                                |                             |                                |                              |                              |                            |                          | √                        |                                 |                          |
| Etnoyer 2013 <sup>63</sup>     |                                               |                           |                           |                               |                           |                         |                           |                                |                             |                                |                              |                              |                            |                          |                          |                                 |                          |
| Myer 2013 <sup>155</sup>       |                                               |                           |                           |                               |                           |                         |                           |                                |                             |                                |                              |                              |                            |                          |                          |                                 |                          |
| Tate 2013 <sup>230</sup>       |                                               |                           |                           |                               |                           |                         |                           |                                |                             |                                |                              |                              |                            |                          |                          |                                 |                          |
| Beaulieu 2014 <sup>23</sup>    |                                               |                           |                           |                               |                           |                         |                           |                                |                             |                                |                              |                              |                            |                          |                          |                                 |                          |
| Munro 2014 <sup>154</sup>      |                                               |                           |                           |                               |                           |                         |                           |                                |                             |                                |                              |                              |                            |                          |                          |                                 |                          |
| Achenbach 2018 <sup>3</sup>    |                                               |                           |                           |                               |                           |                         |                           |                                |                             |                                |                              |                              |                            |                          |                          |                                 |                          |
| Foss 2018 <sup>68</sup>        |                                               |                           |                           |                               |                           |                         |                           |                                |                             |                                |                              |                              |                            |                          |                          |                                 |                          |

\*Two studies<sup>26,254</sup> of ACL injuries did not have any overlapping studies and thus were not included.

**Table S6 (continued).** Overlapping Systematic Reviews and Meta-Analyses Pertaining to Prevention of Anterior Cruciate Ligament Injuries\*

| Overlapping Studies            | Included Systematic Reviews and Meta-Analyses |                              |                                |                                 |                                  |                                 |                               |                                 |                                 |                              |                                |                                |                                |                                 |                              |
|--------------------------------|-----------------------------------------------|------------------------------|--------------------------------|---------------------------------|----------------------------------|---------------------------------|-------------------------------|---------------------------------|---------------------------------|------------------------------|--------------------------------|--------------------------------|--------------------------------|---------------------------------|------------------------------|
|                                | Michaelidis<br>2014 <sup>144</sup>            | Noyes<br>2014 <sup>160</sup> | Ramirez<br>2014 <sup>184</sup> | Sugimoto<br>2014 <sup>226</sup> | Stevenson<br>2015 <sup>222</sup> | Sugimoto<br>2015 <sup>227</sup> | Taylor<br>2015 <sup>232</sup> | Monajati<br>2016 <sup>152</sup> | Sugimoto<br>2016 <sup>224</sup> | Pfile<br>2017 <sup>178</sup> | Armitano<br>2018 <sup>12</sup> | Arundale<br>2018 <sup>15</sup> | Neilson<br>2019 <sup>157</sup> | Petushek<br>2019 <sup>176</sup> | Huang<br>2020 <sup>106</sup> |
| Ekstrand 1983 <sup>54</sup>    |                                               |                              |                                |                                 |                                  |                                 |                               |                                 |                                 |                              |                                |                                |                                |                                 |                              |
| Caraffa 1996 <sup>36</sup>     |                                               |                              |                                |                                 | √                                |                                 |                               |                                 |                                 |                              |                                | √                              |                                |                                 |                              |
| Hewett 1999 <sup>97</sup>      | √                                             | √                            | √                              |                                 | √                                | √                               | √                             |                                 | √                               | √                            |                                | √                              |                                | √                               |                              |
| Wedderkopp 1999 <sup>256</sup> |                                               |                              |                                |                                 |                                  |                                 |                               |                                 |                                 |                              |                                |                                |                                |                                 |                              |
| Heidt 2000 <sup>93</sup>       | √                                             |                              | √                              | √                               | √                                | √                               | √                             |                                 | √                               |                              |                                |                                |                                | √                               |                              |
| Soderman 2000 <sup>215</sup>   | √                                             |                              | √                              | √                               | √                                | √                               | √                             |                                 | √                               |                              |                                |                                |                                | √                               | √                            |
| Onate 2001 <sup>166</sup>      |                                               |                              |                                |                                 |                                  |                                 |                               |                                 |                                 |                              | √                              |                                | √                              |                                 |                              |
| Myklebust 2003 <sup>156</sup>  | √                                             |                              |                                | √                               | √                                | √                               | √                             |                                 | √                               | √                            |                                | √                              |                                | √                               |                              |
| Mandelbaum 2005 <sup>136</sup> | √                                             | √                            | √                              | √                               | √                                | √                               | √                             |                                 | √                               | √                            |                                | √                              |                                | √                               |                              |
| Olsen 2005 <sup>164</sup>      | √                                             | √                            |                                | √                               | √                                |                                 | √                             |                                 | √                               | √                            |                                | √                              |                                | √                               | √                            |
| Onate 2005 <sup>165</sup>      |                                               |                              |                                |                                 |                                  |                                 |                               |                                 |                                 |                              | √                              |                                | √                              |                                 |                              |
| Petersen 2005 <sup>175</sup>   | √                                             |                              | √                              | √                               | √                                | √                               | √                             |                                 | √                               | √                            |                                | √                              |                                | √                               |                              |
| Pfeiffer 2006 <sup>177</sup>   | √                                             | √                            | √                              | √                               | √                                | √                               | √                             |                                 | √                               | √                            |                                | √                              |                                | √                               |                              |
| Gilchrist 2008 <sup>75</sup>   | √                                             |                              | √                              | √                               | √                                | √                               | √                             |                                 | √                               | √                            |                                | √                              |                                | √                               | √                            |
| Pasanen 2008 <sup>170</sup>    | √                                             |                              | √                              | √                               |                                  | √                               | √                             |                                 | √                               |                              |                                |                                |                                | √                               |                              |
| Steffen 2008 <sup>220</sup>    | √                                             | √                            | √                              | √                               | √                                | √                               | √                             |                                 | √                               | √                            |                                |                                |                                | √                               | √                            |
| Lim 2009 <sup>220</sup>        |                                               |                              |                                |                                 |                                  |                                 |                               | √                               |                                 |                              |                                |                                |                                |                                 |                              |
| Kiani 2010 <sup>118</sup>      |                                               |                              |                                |                                 |                                  |                                 |                               |                                 | √                               | √                            |                                | √                              |                                | √                               |                              |
| Vescovi 2010 <sup>252</sup>    |                                               |                              |                                |                                 |                                  |                                 |                               |                                 |                                 |                              |                                | √                              |                                |                                 |                              |
| LaBella 2011 <sup>125</sup>    |                                               | √                            |                                | √                               |                                  | √                               | √                             |                                 | √                               | √                            |                                | √                              |                                | √                               | √                            |
| Parsons 2012 <sup>169</sup>    |                                               |                              |                                |                                 |                                  |                                 |                               |                                 |                                 |                              | √                              |                                | √                              |                                 |                              |
| Walden 2012 <sup>253</sup>     | √                                             | √                            | √                              | √                               |                                  | √                               | √                             |                                 | √                               | √                            |                                | √                              |                                | √                               | √                            |
| Etnoyer 2013 <sup>63</sup>     |                                               |                              |                                |                                 |                                  |                                 |                               |                                 |                                 |                              | √                              |                                | √                              |                                 |                              |
| Myer 2013 <sup>155</sup>       |                                               |                              |                                |                                 |                                  |                                 |                               |                                 |                                 |                              | √                              |                                | √                              |                                 |                              |
| Tate 2013 <sup>230</sup>       |                                               |                              |                                |                                 |                                  |                                 |                               |                                 |                                 |                              | √                              |                                | √                              |                                 |                              |
| Beaulieu 2014 <sup>23</sup>    |                                               |                              |                                |                                 |                                  |                                 |                               |                                 |                                 |                              | √                              |                                | √                              |                                 |                              |
| Munro 2014 <sup>154</sup>      |                                               |                              |                                |                                 |                                  |                                 |                               |                                 |                                 |                              | √                              |                                | √                              |                                 |                              |
| Achenbach 2018 <sup>3</sup>    |                                               |                              |                                |                                 |                                  |                                 |                               |                                 |                                 |                              |                                | √                              |                                | √                               |                              |
| Foss 2018 <sup>68</sup>        |                                               |                              |                                |                                 |                                  |                                 |                               |                                 |                                 |                              |                                |                                |                                | √                               | √                            |

\*Two studies<sup>26,254</sup> of ACL injuries did not have any overlapping studies and thus were not included.

**Table S7.** Overlapping Systematic Reviews and Meta-Analyses Pertaining to Prevention of Ankle Injuries\*

| Overlapping Studies               | Included Systematic Reviews and Meta-Analyses |                                 |                               |                             |                                 |                                 |                             |                               |                                     |                               |                              |                                         |                               |                                  |
|-----------------------------------|-----------------------------------------------|---------------------------------|-------------------------------|-----------------------------|---------------------------------|---------------------------------|-----------------------------|-------------------------------|-------------------------------------|-------------------------------|------------------------------|-----------------------------------------|-------------------------------|----------------------------------|
|                                   | Thacker<br>1999 <sup>237</sup>                | Verhagen<br>2000 <sup>250</sup> | McKeon<br>2008 <sup>143</sup> | Dizon<br>2010 <sup>49</sup> | Verhagen<br>2010 <sup>249</sup> | Schiftan<br>2015 <sup>197</sup> | Grimm<br>2016 <sup>83</sup> | Doherty<br>2017 <sup>50</sup> | Kalirathinam<br>2017 <sup>116</sup> | Barelds<br>2018 <sup>20</sup> | Burger<br>2018 <sup>34</sup> | De<br>Vasconcelos<br>2018 <sup>47</sup> | Bellows<br>2018 <sup>25</sup> | Caldemeyer<br>2020 <sup>35</sup> |
| Garrick 1973 <sup>74</sup>        | ✓                                             | ✓                               |                               | ✓                           | ✓                               |                                 |                             |                               |                                     |                               |                              |                                         |                               |                                  |
| Ekstrand 1983 <sup>54</sup>       | ✓                                             |                                 |                               |                             |                                 |                                 | ✓                           |                               |                                     |                               |                              |                                         |                               |                                  |
| Tropp 1985 <sup>241</sup>         | ✓                                             | ✓                               |                               |                             | ✓                               |                                 | ✓                           |                               |                                     |                               |                              |                                         |                               |                                  |
| Rovere 1988 <sup>190</sup>        | ✓                                             | ✓                               |                               |                             | ✓                               |                                 |                             |                               |                                     |                               |                              |                                         |                               |                                  |
| Barrett 1993 <sup>22</sup>        | ✓                                             | ✓                               |                               |                             | ✓                               |                                 |                             |                               |                                     |                               |                              |                                         |                               |                                  |
| Sitler 1994 <sup>210</sup>        | ✓                                             | ✓                               |                               | ✓                           | ✓                               |                                 |                             |                               |                                     | ✓                             |                              |                                         |                               |                                  |
| Surve 1994 <sup>229</sup>         | ✓                                             | ✓                               |                               | ✓                           | ✓                               |                                 |                             |                               |                                     | ✓                             |                              |                                         |                               |                                  |
| Bahr 1997 <sup>18</sup>           | ✓                                             | ✓                               | ✓                             |                             | ✓                               |                                 |                             |                               |                                     |                               |                              |                                         |                               |                                  |
| Holme 1999 <sup>104</sup>         |                                               |                                 | ✓                             |                             | ✓                               |                                 |                             |                               |                                     |                               |                              |                                         |                               |                                  |
| Soderman 2000 <sup>215</sup>      |                                               |                                 |                               |                             | ✓                               | ✓                               | ✓                           |                               |                                     |                               | ✓                            |                                         |                               | ✓                                |
| Stasinopoulos 2004 <sup>218</sup> |                                               |                                 |                               | ✓                           | ✓                               |                                 |                             |                               |                                     |                               | ✓                            |                                         |                               |                                  |
| Verhagen 2004 <sup>248</sup>      |                                               |                                 | ✓                             |                             | ✓                               | ✓                               |                             |                               |                                     |                               |                              | ✓                                       |                               |                                  |
| Petersen 2005 <sup>175</sup>      |                                               |                                 |                               |                             | ✓                               |                                 |                             |                               |                                     |                               |                              |                                         |                               | ✓                                |
| McGuine 2006 <sup>141</sup>       |                                               |                                 | ✓                             |                             | ✓                               | ✓                               |                             |                               | ✓                                   |                               |                              |                                         | ✓                             |                                  |
| Mickel 2006 <sup>146</sup>        |                                               |                                 |                               | ✓                           | ✓                               |                                 |                             |                               |                                     |                               |                              |                                         |                               |                                  |
| Emery 2007 <sup>57</sup>          |                                               |                                 |                               |                             | ✓                               | ✓                               |                             |                               | ✓                                   |                               |                              |                                         | ✓                             |                                  |
| Mohammadi 2007 <sup>150</sup>     |                                               |                                 |                               | ✓                           | ✓                               | ✓                               | ✓                           |                               | ✓                                   | ✓                             | ✓                            | ✓                                       | ✓                             |                                  |
| Engbretsen 2008 <sup>59</sup>     |                                               |                                 |                               |                             | ✓                               |                                 | ✓                           |                               |                                     |                               |                              |                                         |                               |                                  |
| Soligard 2008 <sup>216</sup>      |                                               |                                 |                               |                             | ✓                               |                                 | ✓                           |                               | ✓                                   |                               |                              |                                         |                               | ✓                                |
| Hupperets 2009 <sup>108</sup>     |                                               |                                 |                               |                             |                                 |                                 | ✓                           |                               |                                     |                               |                              | ✓                                       | ✓                             |                                  |
| Eils 2010 <sup>53</sup>           |                                               |                                 |                               |                             |                                 |                                 | ✓                           |                               | ✓                                   |                               |                              | ✓                                       | ✓                             |                                  |
| McGuine 2011 <sup>139</sup>       |                                               |                                 |                               |                             |                                 |                                 |                             |                               |                                     | ✓                             |                              |                                         | ✓                             |                                  |
| McGuine 2012 <sup>140</sup>       |                                               |                                 |                               |                             |                                 |                                 |                             |                               |                                     | ✓                             |                              |                                         | ✓                             |                                  |

\*One study<sup>33</sup> on the topic of ankle injuries did not have overlapping studies and thus was not included.

**Table S8.** Overlapping Systematic Reviews and Meta-Analyses Pertaining to Prevention of Hamstring Injuries

| Overlapping Studies                  | Included Systematic Reviews and Meta-Analyses |                              |                               |                              |                             |                                 |                                 |                               |                               |                                |                                |
|--------------------------------------|-----------------------------------------------|------------------------------|-------------------------------|------------------------------|-----------------------------|---------------------------------|---------------------------------|-------------------------------|-------------------------------|--------------------------------|--------------------------------|
|                                      | Hibbert<br>2008 <sup>101</sup>                | Prior<br>2009 <sup>183</sup> | Goldman<br>2010 <sup>78</sup> | Rogan<br>2013 <sup>186</sup> | Goode<br>2015 <sup>80</sup> | Michalis<br>2016 <sup>145</sup> | Monajati<br>2016 <sup>152</sup> | Al Attar<br>2017 <sup>6</sup> | Shadle<br>2017 <sup>203</sup> | Van Dyk<br>2019 <sup>245</sup> | Vatovec<br>2019 <sup>247</sup> |
| Soderman 2000 <sup>215</sup>         |                                               |                              | √                             |                              |                             |                                 |                                 |                               |                               |                                | √                              |
| Askling 2003 <sup>17</sup>           | √                                             | √                            | √                             |                              | √                           | √                               |                                 |                               | √                             |                                | √                              |
| Sherry 2004 <sup>206</sup>           |                                               | √                            |                               |                              |                             | √                               |                                 |                               |                               |                                |                                |
| Mjolsnes 2004 <sup>149</sup>         |                                               |                              |                               |                              |                             | √                               | √                               |                               |                               |                                |                                |
| Verrall 2005 <sup>251</sup>          |                                               | √                            |                               | √                            |                             |                                 |                                 |                               |                               |                                | √                              |
| Gabbe 2006 <sup>71</sup>             | √                                             | √                            | √                             |                              | √                           | √                               |                                 |                               |                               | √                              |                                |
| Brooks 2006 <sup>31</sup>            | √                                             |                              |                               |                              |                             |                                 |                                 |                               |                               |                                | √                              |
| Arnason 2008 <sup>13</sup>           | √                                             |                              |                               | √                            |                             |                                 |                                 |                               | √                             | √                              | √                              |
| Emery 2007 <sup>57</sup>             |                                               |                              | √                             |                              |                             | √                               |                                 |                               |                               |                                | √                              |
| Soligard 2008 <sup>216</sup>         |                                               |                              |                               |                              |                             | √                               |                                 | √                             |                               | √                              | √                              |
| Engebretsen 2008 <sup>59</sup>       |                                               |                              | √                             |                              | √                           |                                 |                                 | √                             |                               | √                              |                                |
| Brughelli 2010 <sup>32</sup>         |                                               |                              |                               |                              |                             | √                               | √                               |                               |                               |                                |                                |
| Petersen 2011 <sup>174</sup>         |                                               |                              |                               |                              | √                           | √                               |                                 |                               | √                             | √                              | √                              |
| Daneshjoo 2013 <sup>46</sup>         |                                               |                              |                               |                              |                             | √                               | √                               |                               |                               |                                |                                |
| Grooms 2013 <sup>87</sup>            |                                               |                              |                               |                              |                             |                                 |                                 | √                             |                               | √                              | √                              |
| Sebelien 2014 <sup>201</sup>         |                                               |                              |                               |                              |                             |                                 |                                 |                               |                               | √                              | √                              |
| Seagrave 2014 <sup>200</sup>         |                                               |                              |                               |                              |                             |                                 |                                 |                               |                               | √                              | √                              |
| Van der Horst 2015 <sup>244</sup>    |                                               |                              |                               |                              |                             |                                 |                                 | √                             |                               | √                              | √                              |
| Silvers-Granelli 2015 <sup>208</sup> |                                               |                              |                               |                              |                             |                                 |                                 | √                             |                               | √                              | √                              |
| Nouni-Garcia 2018 <sup>159</sup>     |                                               |                              |                               |                              |                             |                                 |                                 |                               |                               | √                              | √                              |



**Table S9.** Overlapping Systematic Reviews and Meta-Analyses Pertaining to Prevention of Lower Extremity Injuries

| Overlapping Studies              | Included Systematic Reviews and Meta-Analyses |                                |                                |                              |                              |                             |                               |                               |                              |
|----------------------------------|-----------------------------------------------|--------------------------------|--------------------------------|------------------------------|------------------------------|-----------------------------|-------------------------------|-------------------------------|------------------------------|
|                                  | Yeung<br>2001 <sup>261</sup>                  | Thacker<br>2002 <sup>234</sup> | McGuine<br>2006 <sup>141</sup> | Herman<br>2012 <sup>95</sup> | Andrew<br>2013 <sup>10</sup> | Emery<br>2015 <sup>58</sup> | McCall<br>2015 <sup>137</sup> | Taylor<br>2015 <sup>231</sup> | Steib<br>2017 <sup>221</sup> |
| Andrish 1974 <sup>11</sup>       | √                                             | √                              |                                |                              |                              |                             |                               |                               |                              |
| Schwellnus 1990 <sup>199</sup>   | √                                             | √                              |                                |                              |                              |                             |                               |                               |                              |
| Van Mechelen 1993 <sup>246</sup> | √                                             |                                |                                |                              | √                            |                             |                               |                               |                              |
| Hartig 1999 <sup>92</sup>        | √                                             |                                |                                |                              | √                            |                             |                               |                               |                              |
| Hewett 1999 <sup>97</sup>        |                                               |                                | √                              |                              |                              | √                           |                               |                               | √                            |
| Wedderkopp 1999 <sup>256</sup>   |                                               |                                | √                              |                              |                              | √                           |                               |                               | √                            |
| Pope 2000 <sup>181</sup>         | √                                             |                                |                                |                              | √                            |                             |                               |                               |                              |
| Junge 2002 <sup>115</sup>        |                                               |                                | √                              |                              |                              | √                           |                               |                               |                              |
| Mandelbaum 2005 <sup>136</sup>   |                                               |                                |                                | √                            |                              | √                           |                               |                               |                              |
| Olsen 2005 <sup>164</sup>        |                                               |                                | √                              |                              |                              | √                           |                               |                               | √                            |
| McGuine 2006 <sup>141</sup>      |                                               |                                | √                              |                              |                              | √                           |                               |                               | √                            |
| Pfeiffer 2006 <sup>177</sup>     |                                               |                                |                                | √                            |                              | √                           |                               | √                             | √                            |
| Emery 2007 <sup>57</sup>         |                                               |                                |                                |                              |                              | √                           |                               | √                             | √                            |
| McHugh 2007 <sup>142</sup>       |                                               |                                |                                |                              |                              | √                           |                               |                               | √                            |
| Soligard 2008 <sup>216</sup>     |                                               |                                |                                | √                            |                              | √                           |                               |                               | √                            |
| Emery 2010 <sup>56</sup>         |                                               |                                |                                |                              |                              | √                           |                               |                               | √                            |
| Kiani 2010 <sup>118</sup>        |                                               |                                |                                | √                            |                              | √                           |                               |                               |                              |
| LaBella 2011 <sup>125</sup>      |                                               |                                |                                | √                            |                              | √                           |                               | √                             | √                            |
| Longo 2012 <sup>133</sup>        |                                               |                                |                                |                              |                              | √                           |                               | √                             | √                            |
| Walden 2012 <sup>253</sup>       |                                               |                                |                                |                              |                              | √                           |                               |                               | √                            |
| Hagglund 2013 <sup>90</sup>      |                                               |                                |                                |                              |                              | √                           | √                             |                               |                              |
| Steffen 2013 <sup>219</sup>      |                                               |                                |                                | √                            |                              | √                           |                               |                               |                              |

**Table S10.** Overlapping Systematic Reviews and Meta-Analyses Pertaining to Prevention of Foot Injuries

| Overlapping Studies            | Included Systematic Reviews and Meta-Analyses |                           |                          |                             |                            |                            |
|--------------------------------|-----------------------------------------------|---------------------------|--------------------------|-----------------------------|----------------------------|----------------------------|
|                                | Gillespie 2000 <sup>76</sup>                  | Jones 2002 <sup>114</sup> | Rome 2005 <sup>187</sup> | Shaffer 2006 <sup>204</sup> | Peters 2016 <sup>173</sup> | Bonanno 2017 <sup>29</sup> |
| Andrish 1974 <sup>11</sup>     | √                                             |                           | √                        | √                           |                            |                            |
| Milgrom 1985 <sup>148</sup>    | √                                             | √                         | √                        | √                           |                            | √                          |
| Bensel 1986 <sup>27</sup>      |                                               |                           | √                        | √                           |                            |                            |
| Gardner 1988 <sup>73</sup>     | √                                             | √                         | √                        | √                           |                            |                            |
| Schwellnus 1990 <sup>199</sup> | √                                             | √                         | √                        | √                           |                            |                            |
| Milgrom 1992 <sup>147</sup>    | √                                             |                           | √                        | √                           | √                          |                            |
| Schwellnus 1992 <sup>198</sup> | √                                             |                           | √                        | √                           |                            |                            |
| Pope 1998 <sup>180</sup>       |                                               |                           | √                        | √                           | √                          |                            |
| Finestone 1999 <sup>66</sup>   |                                               |                           | √                        | √                           |                            | √                          |
| Pope 2000 <sup>181</sup>       |                                               |                           | √                        | √                           |                            |                            |
| Mundermann 2001 <sup>153</sup> |                                               |                           | √                        | √                           |                            |                            |
| Larsen 2002 <sup>126</sup>     |                                               |                           |                          |                             | √                          | √                          |
| Finestone 2004 <sup>67</sup>   |                                               |                           | √                        | √                           |                            | √                          |
